# Supplementary material for: Content Exclusivity on Advertising Revenue–Sharing Platforms
Source: Atypon-hosted journal article supplement (doi:10.1287/isre.2025.1852), 2026-02-05
Supplement: isre.2025.1852.sm1.docx [file isre.2025.1852.sm1.docx]

# Online Appendix

This Online Appendix presents the detailed analyses omitted in the main paper. Part A provides the equilibrium analysis of the main model. Part B contains the proofs of propositions and corollaries in the main model. Part C explores the scenario where the platforms adopt optional exclusivity and set different revenue-sharing rates for single-homing (exclusive) and multihoming (nonexclusive) providers. Part D introduces provider heterogeneity with both influential and fringe providers in the market, with only influential providers receiving ad revenue and being subject to exclusivity. Part E investigates the model with both provider heterogeneity and differentiated revenue sharing. Part F considers the situation where platforms offer consumers not only content from independent third-party providers but also their own original content. Part G investigates the case in which content providers incur extra multihoming costs. Part H examines the scenario in which platforms face monitoring costs when enforcing exclusive contracts. Part I examines the situation in which consumers experience diminishing returns from additional providers on platforms. Part J investigates the case where the platforms deliver asymmetric base values to consumers. Part K examines the case in which the platforms have different marginal ad revenues. Part L investigates the case in which the platforms simultaneously choose whether to adopt exclusivity and their ad revenue-sharing rates. Part M examines a model in which consumers multi-home. Part N explores the scenario where single-homing content providers generate higher marginal ad revenue per consumer than multi-homing providers.

## Part A: Analysis of the Main Model

In this part, we present the equilibrium analysis of the main model. Specifically, we analyze the equilibrium results under nonexclusive and exclusive contracts.

### Neither Platform Imposes Exclusivity ()

In the nonexclusive case, the platforms determine the corresponding revenue-sharing rates to maximize their profits as below:

, (A1)

. (A2)

The first-order conditions with respect to and are

(A3)

We use a bar above the variables () to denote the case of nonexclusive contracts. Solving (A3) simultaneously yields the unique symmetric solution . Taking the second-order derivatives of gives . We have . Similarly, we can get . Thus, the second-order condition is satisfied, confirming that are the equilibrium revenue-sharing rates.

Plugging in , we obtain market sizes and profits as follows:

,

,

.

For the above equilibrium to exist, we need to ensure that the platforms share only a fraction of ad revenues with content providers, i.e., . In addition, we focus on the case of partial multihoming on the provider side, meaning that only a subset of content providers (rather than all) multi-home in the nonexclusive case. Accordingly, the equilibrium number of content providers on a platform must satisfy .[[1]](#footnote-1) These conditions lead to the following constraints:

and , (A4)

where . In the following analysis, we assume that the constraints specified in (A4) hold.

### Either or Both Platforms Impose Exclusivity ()

Under exclusive contracts, the number of consumers on each platform is defined as follows:

, (A5)

. (A6)

The number of content providers on each platform is given by

(A7)

(A8)

The kinks in (A7) and (A8) are determined by whether or not the provider market is fully covered. We focus on the case that the provider market is fully covered, i.e., .

Solving (A5), (A6), (A7), and (A8) simultaneously for and () yields the following market sizes as functions of the ad revenue-sharing rates:

,

,

,

.

The platforms determine the ad revenue-sharing rates to maximize their profits as below:

, (A9)

. (A10)

The first-order conditions with respect to and are

(A11)

We use a tilde above the variables () to indicate the case with exclusive contracts. Solving (A11) simultaneously yields the unique symmetric solution . Taking the second-order derivatives of gives . Given (A4), we have . Similarly, we can get that . Thus, the second-order condition is satisfied, confirming that are the equilibrium revenue-sharing rates.

Plugging in , we obtain market sizes and profits as follows:

,

,

.

Two conditions are required for the above equilibrium to hold. First, the platforms only share a fraction of their ad revenues with content providers, i.e., . Second, we need to guarantee that the provider market is fully covered with all providers obtaining a positive surplus; that is, the indifferent participant located at on the provider side must have a positive net surplus in equilibrium: . Given (A4), these conditions impose an additional constraint on , given by

. (A12)

We want to clarify that, under condition (A12), no kink equilibrium emerges (see Mérel and Sexton, 2010), and the aforementioned outcomes constitute the unique and stable Nash equilibrium, characterized by a fully covered provider market under exclusive contracts. Given (A5)~(A8), the profit of platform can be expressed as , where denotes platform ’s profit when the provider market is fully covered and denotes profit when the provider market is partially covered. Specifically, , , and . Given , platform sets the optimal to maximize its profit. Let be the solution to and let be the solution to . By comparing , , and , we can get platform’s reaction function , where solves and solves . Following similar steps, we can get the reaction function of platform (). The Nash equilibria are determined by the intersection of the reaction curves and . Following derivations in Yin (2004) and Mérel and Sexton (2010), we can distinguish the following cases.

When the provider-side differentiation is low (i.e., ), all providers join one of the platforms in equilibrium, resulting in a fully-covered provider market. In this case, the indifferent provider obtains a positive surplus, and the equilibrium ad revenue-sharing rates are . This scenario is the focus of our analysis under exclusive contracts, enabling us to examine the impacts of exclusivity.

When the provider-side differentiation is moderate (i.e., ), the reaction functions and overlap, producing a continuum of equilibria (i.e., multiple kink equilibria arise). In this case, the indifferent provider obtains zero surplus, the provider market is fully covered, and the equilibrium ad revenue-sharing rates satisfy .

When the provider-side differentiation is high (i.e., ), each platform operates as a monopolist in the provider market and determines its ad revenue-sharing rate independently. In this case, the provider market is partially covered, and the equilibrium ad revenue-sharing rates are .

Thus, given the condition (A12), the provider market is fully covered and no kink equilibrium arises under exclusive contracts. This study concentrates on the scenario characterized by positive revenue-sharing rates, partial multihoming (under nonexclusive case), and full provider participation (all providers obtain a positive surplus). Accordingly, we assume that both conditions (A4) and (A12) are satisfied. Specifically, the following parameter conditions hold:

and . (A13)

Throughout the main paper, we adhere to the parameter constraints defined by (A13).

**References**

Mérel PR, Sexton RJ (2010) Kinked-demand equilibria and weak duopoly in the hotelling model of horizontal differentiation. *B.E. J. Theor. Econ.* 10(1):1–34.

Yin X (2004) Two-part tariff competition in duopoly. *Int. J. Ind. Organ.* 22(6):799–820.

## Part B: Proofs of Propositions and Corollaries in the Main Model

**Proof of Proposition 1**. We examine how exclusive contracts impact ad revenue-sharing rates by comparing with , where and . Substituting these expressions gives us , where . Given (A13), we have and .[[2]](#footnote-2) Thus, when (and when ). One can easily verify that when or (and when ). Hence, we get thatwhen (andwhen)*.* Moreover, it is evident that increases in . This completes the proof of Proposition 1. □

**Proof of Proposition 2**. We examine how exclusive contracts impact the platforms’ profits by comparing with , where and . Plugging in, we have , where . Conditional on (A13), we have and . Thus, when (and when ). Note that . One can verify that . That is, increases in . Further, we get that can hold and . Thus, there exists a threshold such that (i.e., ) if and (i.e., ) if . Meanwhile, we have . Thus, we have .

Next, we prove that increases in . Note that is the unique solution of . Given , using implicit differentiation, we get . Conditional on , we have and . Thus, we get that . This completes the proof of Proposition 2. □

**Proof of Corollary 1.** Exclusive contracts arise as the equilibrium when . From the proof of Proposition 2, exclusive contracts emerge as the equilibrium only when . This completes the proof of Corollary 1. □

**Proof of Proposition 3**. We examine how exclusive contracts impact the content providers’ total surplus by comparing with , where and . Plugging in, we have , where . Let and be the two solutions of . Then, when or (and when ). One can show that and can locate within the interval . We depict the analysis into two cases. First, given , . Thus, ; Second, given , . Thus, when (and when ), where Conditional on , one can verify that . That is, decreases in . Note also , and . Hence, first increases and then decreases in . Further, one can show that and can be negative, and there can happen . Thus, there exist thresholds and () such that (i.e., ) when and (i.e., ) when or . Moreover, one can verify that , which means that . Thus, given , when and when .

Next, we prove that increases in . Rewriting as . Then, when and when . Conditional on , the feasible region can be rewritten as .[[3]](#footnote-3) We have . That is, decreases in . Following similar steps, one can verify that . Thus, decreases in . Furthermore, and there can happen . Thus, first increases and then decreases in . Similarly, and there can happen . We can conclude that there exists a threshold value such that (i.e., ) when and (i.e., ) when . As proved previously, when and when . Thus, is the inverse function of . For any and , holds if and only if ( holds if and only if ). Assuming that and , we have and . Note also equals to . Thus, increases in . This ends the proof of Proposition 3. □

**Proof of proposition 4**. By combining the results of Propositions 2 and 3, one can derive the results. This ends the proof of Proposition 4. □

**Proof of proposition 5**. (a) We first compare with , where and . Plugging in, we have . Note that increases in . Conditional on (A13), we have . That is, .

(b) Next, we compare with , where and . Plugging in, we have , where and . Let and be the two solutions of . Then, when or . Note also that when . Given , we depict the following analysis into four cases. First, given , and . Thus, when (and when ), where . Note that . Conditional on , we have and. Hence, when ; Second, given , and . Thus, we get that when ; Third, given , this region always locates outside our feasible region; Fourth, given , and Thus, when (and when ). Conditional on , we have and . Thus, increases in . Further, we can verify that and can hold.[[4]](#footnote-4) Thus, there exists a threshold such that (i.e., ) if and (i.e., ) if . By summarizing the above results, we get that if and if . This completes the proof of Proposition 5. □

## Part C: Optional Exclusivity

Our main model assumes that exclusive contracts operate as an “all-or-none” rule (equivalently, full exclusivity). In practice, exclusivity may be optional, in which platforms can set different revenue-sharing rates for single-homing (exclusive) and multihoming (nonexclusive) providers. This part provides an analysis of this optional-exclusivity scenario. Let denote platform ’s revenue-sharing rate for single-homing providers, and represent the revenue-sharing rate for multihoming providers. Each content provider can choose one of the three options listed below:

(i) Only join platform : . (C1)

(ii) Only join platform : . (C2)

(iii) Join both platforms and : . (C3)

Given the above utility functions, content providers with will join platform and those with will join platform . Then, the numbers of consumers and content providers joining each platform can be given by

,

,

,

.

The platforms’ profits can be written as

, (C4)

. (C5)

The platforms choose the corresponding ad revenue-sharing rates to maximize their profits. We use a hat above the variables () to indicate the case of optional exclusivity. The first-order conditions with respect to and jointly lead to and . Note that when the parameter constraints defined in (C6) hold, the Hessian matrix of either platform’s profit function can be verified to be negative semidefinite, i.e., . Thus, the second-order condition is satisfied.

The equilibrium ad revenue-sharing rates, market sizes, and platforms’ profits are given by

,

,

,

,

.

Plugging in the equilibrium results, the consumer surplus, providers’ aggregate surplus, and social welfare can be given by

,

,

.

For the above equilibrium to exist, we need to ensure that the platforms share only a fraction of ad revenues with content providers. That is, the equilibrium ad revenue-sharing rates must satisfy and . Moreover, to analyze the impacts of “exclusivity”, we focus on the case where a subset of content providers multi-home under optional exclusivity. Thus, the equilibrium number of content providers on each platform must satisfy . These conditions put constraints on and , given by

and , (C6)

where .

Next, we examine the impact of optional exclusivity by comparing the market outcomes under optional exclusivity and nonexclusive contracts. Following the main model, we focus on the pure-strategy equilibrium characterized by positive revenue-sharing rates, full coverage on both sides of the platform, and partial multihoming in the provider market. Specifically, we assume that and the provider-side differentiation satisfies for the rest of the analysis.[[5]](#footnote-5)

**Proposition C1.** *if and if .*

**Proof of proposition C1**. We first compare with , where and . Plugging in, we have . Thus, when (and when ). Next, we compare with , where . Plugging in, we have when (and when ). Conditional on , we have . That is, increases in and we can get . Thus, if (i.e., ) and if (i.e., ). By summarizing the above results, we can get that if and if . This ends the proof of Proposition C1. □

**Proposition C2.**

1. *if and if .*
2. *if and if .*
3. *if and if .*
4. *There exist thresholds and such that if or; otherwise, .*

**Proof of proposition C2**. (a) We first compare with , where and . Plugging in, we have , where , , and . Note that and . Note that increases in and decreases in . We have and . That is, increases in and decreases in . We can obtain that and . Thus, if (i.e., ) and if (i.e., ).

(b) Next, we compare with , where and . Plugging in, we have when (and when ), where . Let , and be the three solutions of . Then, when or . One can show that and can locate within the feasible region. We depict the analysis into two cases. First, given, . Thus, . Second, given , . when and when , where . Conditional on , we can obtain that . Thus, when (i.e., ) and when (i.e., ). In summary, if and if .

(c) Next, we compare with , where and . Plugging in, we have . Conditional on , we have . Thus, we get that if and if .

(d) We then compare with , where and . Plugging in, we have when and when , where and . Let , and be the three solutions of . Then, when or . when . We can show that , and may locate on the interval . We depict the following analysis into four cases. First, given , and . Thus, when (and when ), where . Conditional on , . That is, decreases in . Note that and can be negative or positive. Thus, decreases or first increases and then decreases in . Note also and can be negative or positive. Thus, there exist thresholds and such that when and when or . Thus, when or; otherwise, . Second, given , and . Thus, . Third, given , and . Hence, . Fourth, given , and . Thus, when (and when ). Conditional on , we can verify that . Hence, we get that if and if . By summarizing the above results, we obtain that if or; otherwise, . This ends the proof of Proposition C2. □

In summary, our main results regarding the impacts of exclusivity on the platforms’ revenue-sharing incentives and their profits remain qualitatively consistent with those in the main model. First, we find that the platforms’ optimal ad revenue-sharing rates for single-homing and multihoming providers under optional exclusivity (i.e., and , ) can be either higher or lower than those under nonexclusive contracts. The intuition is as follows. When consumers’ marginal valuation for content () is low, the number of providers holds limited importance for platform competition, in which case compensation flexibility induced by optional exclusivity has the effect of moderating the compensation competition between platforms. As a result, the platforms set lower revenue-sharing rates under optional exclusivity than under nonexclusive contracts. Meanwhile, in comparison with “switchers” (multi-homing providers), who do not have strong preferences for either platform, the platform will set a much lower revenue-sharing rate for “loyal” (single-homing) providers, who have strong preferences for one platform. When is high, the number of providers plays a very important role in platform competition. In this case, compensation flexibility will lead to fiercer compensation competition between platforms, making the equilibrium ad revenue sharing rates for single-homing and multihoming providers higher under optional exclusivity than under nonexclusive contracts. Also, it is more beneficial to keep the “loyal” (single-homing) providers, and less efficient to attract the “switchers” (multi-homing providers). Hence the platforms find it optimal to set a much higher revenue-sharing rate for single-homing providers.

Second, our analysis demonstrates that relative to nonexclusive (multihoming) contracts, the platforms prefer optional exclusivity when consumers’ marginal valuation for content () is low, and prefer nonexclusive contracts when valuation is high. This result aligns with that in the main model. The intuition also hinges on the direct and strategic effects of exclusivity. However, the platforms’ additional degree of freedom enables within-platform (menu-based) price discrimination. In the low-valuation region where exclusivity raises platform profits, the equilibrium within-platform contract menu sets the sharing rates for both single-homing and multihoming providers below the nonexclusive benchmark. Intuitively, the menu softens compensation competition and, together with reduced same-side crowding among providers, allows platforms to lower sharing rates while sustaining provider participation, thereby shifting surplus away from providers. Thus, in the parameter region where optional exclusivity increases platform profits, provider surplus declines. This contrasts with the main model, where platform-wide exclusivity can yield a win–win for platforms and providers.

## Part D: Selective Exclusivity with Partial Revenue Sharing

In the main model, we assume that content providers are horizontally differentiated in platform preferences (Hotelling), but their marginal contribution to consumer utility is homogeneous: consumer utility increases linearly in the number of providers on a platform. In practice, however, exclusive contracts typically target only a subset of providers. This part examines the impact of selective exclusivity on market outcomes. We consider two types of providers in the market: a proportion of providers who produce high-value content and significantly enhance consumer utility, referred to as influential providers. The remaining proportion consists of fringe providers who produce low-value content and are not eligible to receive ad revenue from the platforms.[[6]](#footnote-6) Only influential providers are required to sign exclusive contracts with the platforms. Consumer receives the following utilities from joining platform and platform , respectively:

, (D1)

, (D2)

where represents the symmetric base value of each platform. and denote the marginal valuations for content from influential and fringe providers, respectively. and represent the numbers of influential and fringe providers on platform , respectively.

Influential providers are uniformly distributed along a Hotelling segment with density . We assume that the presence of fringe providers does not impose competitive costs on influential providers. The utility that influential provider obtains from joining platforms and is given by

, (D3)

, (D4)

where represents the marginal ad revenue from influential providers.

Fringe providers decide independently whether or not to join a platform, regardless of their entry decision for the other platform. Each provider incurs a fixed cost to join a platform, with uniformly distributed over . A fringe provider’s utility from joining platform is given by , where represents fringe providers’ marginal payoff from interacting with consumers on platforms. Thus, the number of fringe providers who join platform is given by

, . (D5)

The platforms obtain revenue from content posted by both influential and fringe providers. Let denote the marginal ad revenue from fringe providers. Without loss of generality, is normalized to , while . Thus, the profit functions of the platforms are given by

, (D6)

. (D7)

Following the analysis in the main model, we focus on the pure-strategy equilibrium characterized by positive revenue-sharing rates, full coverage on both sides of the platform, and partial multihoming in the provider market. All other assumptions remain the same as those in the main model.

### Neither Platform Imposes Exclusivity ()

Under nonexclusive contracts, given the consumers’ utility functions in (D1) and (D2), the numbers of consumers on each platform are given by

, (D8)

. (D9)

Given influential providers’ utility functions in (D3) and (D4), the numbers of influential providers on each platform are given by

, (D10)

. (D11)

Simultaneously solving (D5) and (D8)~(D11) gives the following market sizes as functions of the ad revenue-sharing rates:

*,*

*,*

*,*

*,*

*,*

,

where .

Next, the platforms choose their ad revenue-sharing rates to maximize their profits in (D6) and (D7). Following the analysis in the main model, the second-order condition is satisfied when the parameter constraints defined in (D16) hold.

The equilibrium ad revenue-sharing rates, market sizes, and profits are as follows:

,

,

,

,

,

where .

The above pure strategy equilibrium with full provider coverage and partial multihoming exists only when and . These conditions lead to the following constraints:

and , (D12)

where .

The equilibrium consumer surplus, providers’ total surplus, and social welfare can be given by

,

,

;

,

where .

### Either or Both Platforms Impose Exclusivity ()

Under exclusive contracts, when the influential provider maker is fully covered, the numbers of influential providers on each platform are given by

, (D13)

. (D14)

Simultaneously solving (D5), (D8)~(D9), and (D13)~(D14), gives the following market sizes as functions of the ad revenue-sharing rates:

*,*

*,*

*,*

*,*

*,*

.

Next, the platforms choose their ad revenue-sharing rates to maximize their profits in (D6) and (D7). Following the analysis in the main model, the second-order condition is satisfied when the parameter constraints defined in (D16) hold.

The equilibrium ad revenue-sharing rates, market sizes, and profits are as follows:

,

,

,

,

.

The above equilibrium with full market coverage on both sides of the platform exists only when and . These conditions lead to the following constraints:

and . (D15)

Following the analysis in the main model, we verify that, under condition (D15), no kink equilibrium emerges, and the aforementioned outcomes constitute the unique and stable Nash equilibrium, characterized by a fully covered influential provider market under exclusive contracts.

The equilibrium consumer surplus, providers’ total surplus, and social welfare can be given by

,

,

,

;

.

Following the analysis of the main model, we focus on the pure-strategy equilibrium characterized by positive revenue-sharing rates, full provider coverage, and partial multihoming. Accordingly, for the rest of our analysis, parameter constraints (D12) and (D15) hold simultaneously. That is, the following constraints hold:

and . (D16)

Next, we examine the impact of exclusivity on platforms’ ad revenue-sharing incentives. Proposition D1 summarizes our findings.

**Proposition D1.** *When consumers’ marginal valuation of influential providers is low (high), the platforms’ optimal ad revenue-sharing rates under exclusive contracts are lower (higher) than under nonexclusive contracts. Mathematically, there exists , which increases in , such that if , and if .*

**Proof of Proposition D1.** We examine how exclusive contracts impact ad revenue-sharing rates by comparing with , where and . when (and when ), where . Conditional on (D16), satisfies , where Note that . That is, decreases in . Following similar steps, we can show that decreases in . decreases in or first increases and then decreases in . Furthermore, we have and . Thus, first increases and then decreases in . We also have and . Therefore, there exists a threshold such that(i.e., )when and (i.e., )when *.*

Next, we prove that increases in . Following the proof of Proposition 3 in the main model, one can rewrite as . Then, when and when . One can verify that there exists a threshold value such that (i.e., ) when and (i.e., ) when . As proved previously, when and when . Thus, is the inverse function of . For any and , holds if and only if ( holds if and only if ). Assuming that and , we have and . Note also equals to . Thus, increases in . This completes the proof of Proposition D1. □

**Proposition D2.** *Exclusive contracts will increase (decrease) platforms’ profits if consumers’ marginal valuation of influential providers is low (high). Mathematically, there exists a threshold , which increases in , such that if , and if .*

**Proof of Proposition D2.** We examine how exclusive contracts impact platforms’ profits by comparing with , where and . Plugging in, when (and when ), where . Note that . That is, increases in . Following similar steps, one can verify that decreases, increases, or first decreases and then increases in . decreases, increases, or first increases and then decreases in . increases or first decreases and then increases in . and decreases, increases, or first decreases and then increases in . Conditional on , we can obtain that and can be positive or negative. Therefore, there exists a threshold such that (i.e., )when and(i.e., )when.

Next, we prove that increases in . Following the proof of Proposition D1, one can rewrite as . Then, when and when . We get that . That is, increases in . Following similar steps, one can verify that increases in and first increases and then decreases in . The feasible region in (D16) can be rewritten as . and there can happen . Thus, there exists a threshold value such that (i.e., ) when and (i.e., ) when . As proved previously, when and when . Thus, is the inverse function of . For any and , holds if and only if ( holds if and only if ). Assuming that and , we have and . Note also equals to . Thus, increases in . This ends the proof of Proposition D2. □

**Corollary D1.** *Exclusive contracts emerge as the equilibrium only when .*

**Proof of Corollary D1.** Exclusive contracts arise as the equilibrium when . From the proof of Proposition D2, exclusive contracts emerge as the equilibrium only when . This completes the proof of Corollary D1. □

**Proposition D3.** *When exclusivity is the equilibrium (i.e., ), exclusive contracts will decrease (increase) providers’ total surplus if consumers’ marginal valuation of influential providers is low (high). Mathematically, there exists a threshold , which increases in , such that if , and if .*

**Proof of Proposition D3.** We examine how exclusive contracts impact content providers’ total surplus by comparing with , where and . Plugging in, we have when (and when ), where . Let and be the two solutions of . Then, when or (and when ). One can show that only can locate within the feasible parameter region defined in (D16). Following the analysis in the main model, we depict the analysis into two cases. First, given , . Thus, ; Second, given , . Thus, when (and when ), where Conditional on , one can verify that . That is, decreases in . Following similar steps, we can show that and decreases or first increases and then decreases in . Note also , and . Hence, first increases and then decreases in . Further, one can show that and can be negative, and there can happen . Thus, there exist thresholds and () such that (i.e., ) when and (i.e., ) when or . Following the proof in the main model, we can show that . Thus, given , when and when .

Next, we prove that increases in . Following the proof of Proposition 3 in the main model, rewriting as . Then, when and when . Conditional on (D16) and , the feasible region can be rewritten as . We have . That is, decreases in . Following similar steps, one can verify that . Thus, decreases in . Furthermore, and there can happen . Thus, first increases and then decreases in . Similarly, and there can happen . We can conclude that there exists a threshold such that (i.e., ) when and (i.e., ) when . As proved previously, when and when . Thus, is the inverse function of . For any and , holds if and only if ( holds if and only if ). Assuming that and , we have and . Note also equals to . Thus, increases in . This completes the proof of Proposition D3. □

**Proposition D4.** Exclusive contracts can achieve a win-win outcome for platforms and content providers when *consumers’ marginal valuation of influential providers* is moderate. Mathematically,  *and when .*

**Proof of proposition D4**. By combining the results of Propositions D2 and D3, one can derive the results. This ends the proof of Proposition D4. □

**Proposition D5.** *When exclusivity arises as the equilibrium (i.e., when ), we get:*

1. *Exclusive contracts reduce the consumer surplus, i.e., ;*
2. *Exclusive contracts reduce (increase) social welfare when consumers’ marginal valuation of influential providers is low (high). Mathematically, there exists a threshold such that if , and*  *if* .

**Proof of proposition D5**. (a) We first compare with , where and . Plugging in, we have when (and when ). Conditional on (D16), we have . That is, .

(b) Next, we compare with , where and , where . Plugging in, we have , where and . Let and be the two solutions of . Then, when or . Note also that when . Given , we depict the following analysis into four cases. First, given , and . Thus, when (and when ). By repeating the analysis in the main model, one can verify that . Hence, when ; Second, given , and . Thus, we get that when ; Third, given , and . holds; Fourth, given , and Thus, when (and when ). By repeating the analysis in the main model, one can rewrite as . Conditional on , one can verify that increases in . Further, we can verify that and can hold.[[7]](#footnote-8) Thus, there exists a threshold such that if and if . By summarizing the above results, we get that if and if . This completes the proof of Proposition D5. □

In summary, our analysis indicates that the key findings regarding the impacts of exclusivity remain qualitatively similar to those in the main model. Specifically, compared to nonexclusive contracts, exclusive contracts will raise (lower) the platforms’ optimal ad revenue-sharing rates when consumers’ marginal valuation of influential providers () is high (low). Exclusivity benefits the platforms only when is low. Moreover, exclusivity leads to a win-win outcome for platforms and providers when is intermediate. These qualitative results are robust because the same two forces identified in the main model remain operative: a direct effect—exclusivity reduces same-side crowding (notably among influential providers)—and a strategic effect—exclusivity makes revenue sharing a less efficient instrument for attracting providers.

## Part E: Selective Exclusivity with Differentiated Revenue Sharing

In the main model, content providers are assumed to be homogeneous, and platforms apply a uniform ad revenue-sharing rate across all providers. This part examines the impacts of exclusivity by considering provider heterogeneity and differentiated revenue sharing among various providers. We posit the existence of two types of providers in the market: a proportion , designated as influential providers, who produce high-value content, and the remaining proportion , consisting of fringe providers that produce low-value content. Exclusive contracts are mandated for influential providers by the platforms. Consumer receives the following utilities from joining platform and platform , respectively:

, (E1)

, (E2)

where is each platform’s symmetric base value. and denote the marginal valuations for content from influential and fringe providers, respectively. and represent the numbers of influential and fringe providers on platform , respectively.

The platforms discern the type of providers and offer distinct ad revenue-sharing rates for influential and fringe providers. Both types of providers are uniformly distributed along a Hotelling segment with density . Influential provider derives the following utilities from joining platform and platform , respectively:

, (E3)

, (E4)

where denotes platform ’s ad revenue-sharing rate for influential providers. represents the marginal ad revenue from influential providers. and represent the competition costs associated with influential and fringe providers, respectively. Similarly, fringe provider obtains the following utilities from joining platform and platform , respectively:

, (E5)

, (E6)

where denotes platform ’s ad revenue-sharing rate for fringe providers. indicates the marginal ad revenue from fringe providers. Without loss of generality, and are normalized to , while and .

The platforms obtain revenue from content posted by both influential and fringe providers. Thus, the profit functions of the platforms are given by

, (E7)

. (E8)

Following the analysis in the main model, we focus on the pure-strategy equilibrium characterized by positive revenue-sharing rates, full coverage on both sides of the platform, and partial multihoming in the provider market. All other assumptions remain the same as those in the main model.

### Neither Platform Imposes Exclusivity ()

Under nonexclusive contracts, given the consumers’ utility functions in (E1) and (E2), the numbers of consumers on each platform are given by

, (E9)

. (E10)

Given the providers’ utility functions in (E3) ~ (E6), the numbers of providers on each platform are given by

, (E11)

, (E12)

, (E13)

. (E14)

Simultaneously solving (E9)~(E14) gives the following market sizes as functions of the ad revenue-sharing rates:

*,*

*,*

*,*

*,*

*,*

.

Next, the platforms choose their ad revenue-sharing rates (i.e., and ) to maximize their profits in (E7) and (E8).

### Either or Both Platforms Impose Exclusivity ()

Under exclusive contracts, when the influential provider maker is fully covered, the numbers of influential providers on each platform are given by

, (E15)

. (E16)

Simultaneously solving (E9), (E10), and (E13)~(E16), gives the following market sizes as functions of the ad revenue-sharing rates:

*,*

*,*

*,*

*,*

*,*

,

where and .

Next, the platforms choose their ad revenue-sharing rates (i.e., and ) to maximize their profits in (E7) and (E8).

Due to analytical complexity, we cannot derive closed-form solutions for the ad revenue-sharing rates. Thus, we rely on numerical analysis to present our findings. Our results indicate that the key findings regarding the impacts of exclusivity remain qualitatively the same as those in the main model. Specifically, the platforms offer higher ad revenue-sharing rates to influential providers under exclusive contracts compared to nonexclusive contracts when consumers’ marginal valuation of influential providers () is high. Exclusive contracts enhance the platforms’ profits when is relatively low. Exclusive contracts can yield a win-win outcome for platforms and providers when is medium.

**Figure E1. Impacts of Exclusive Contracts**

**()**


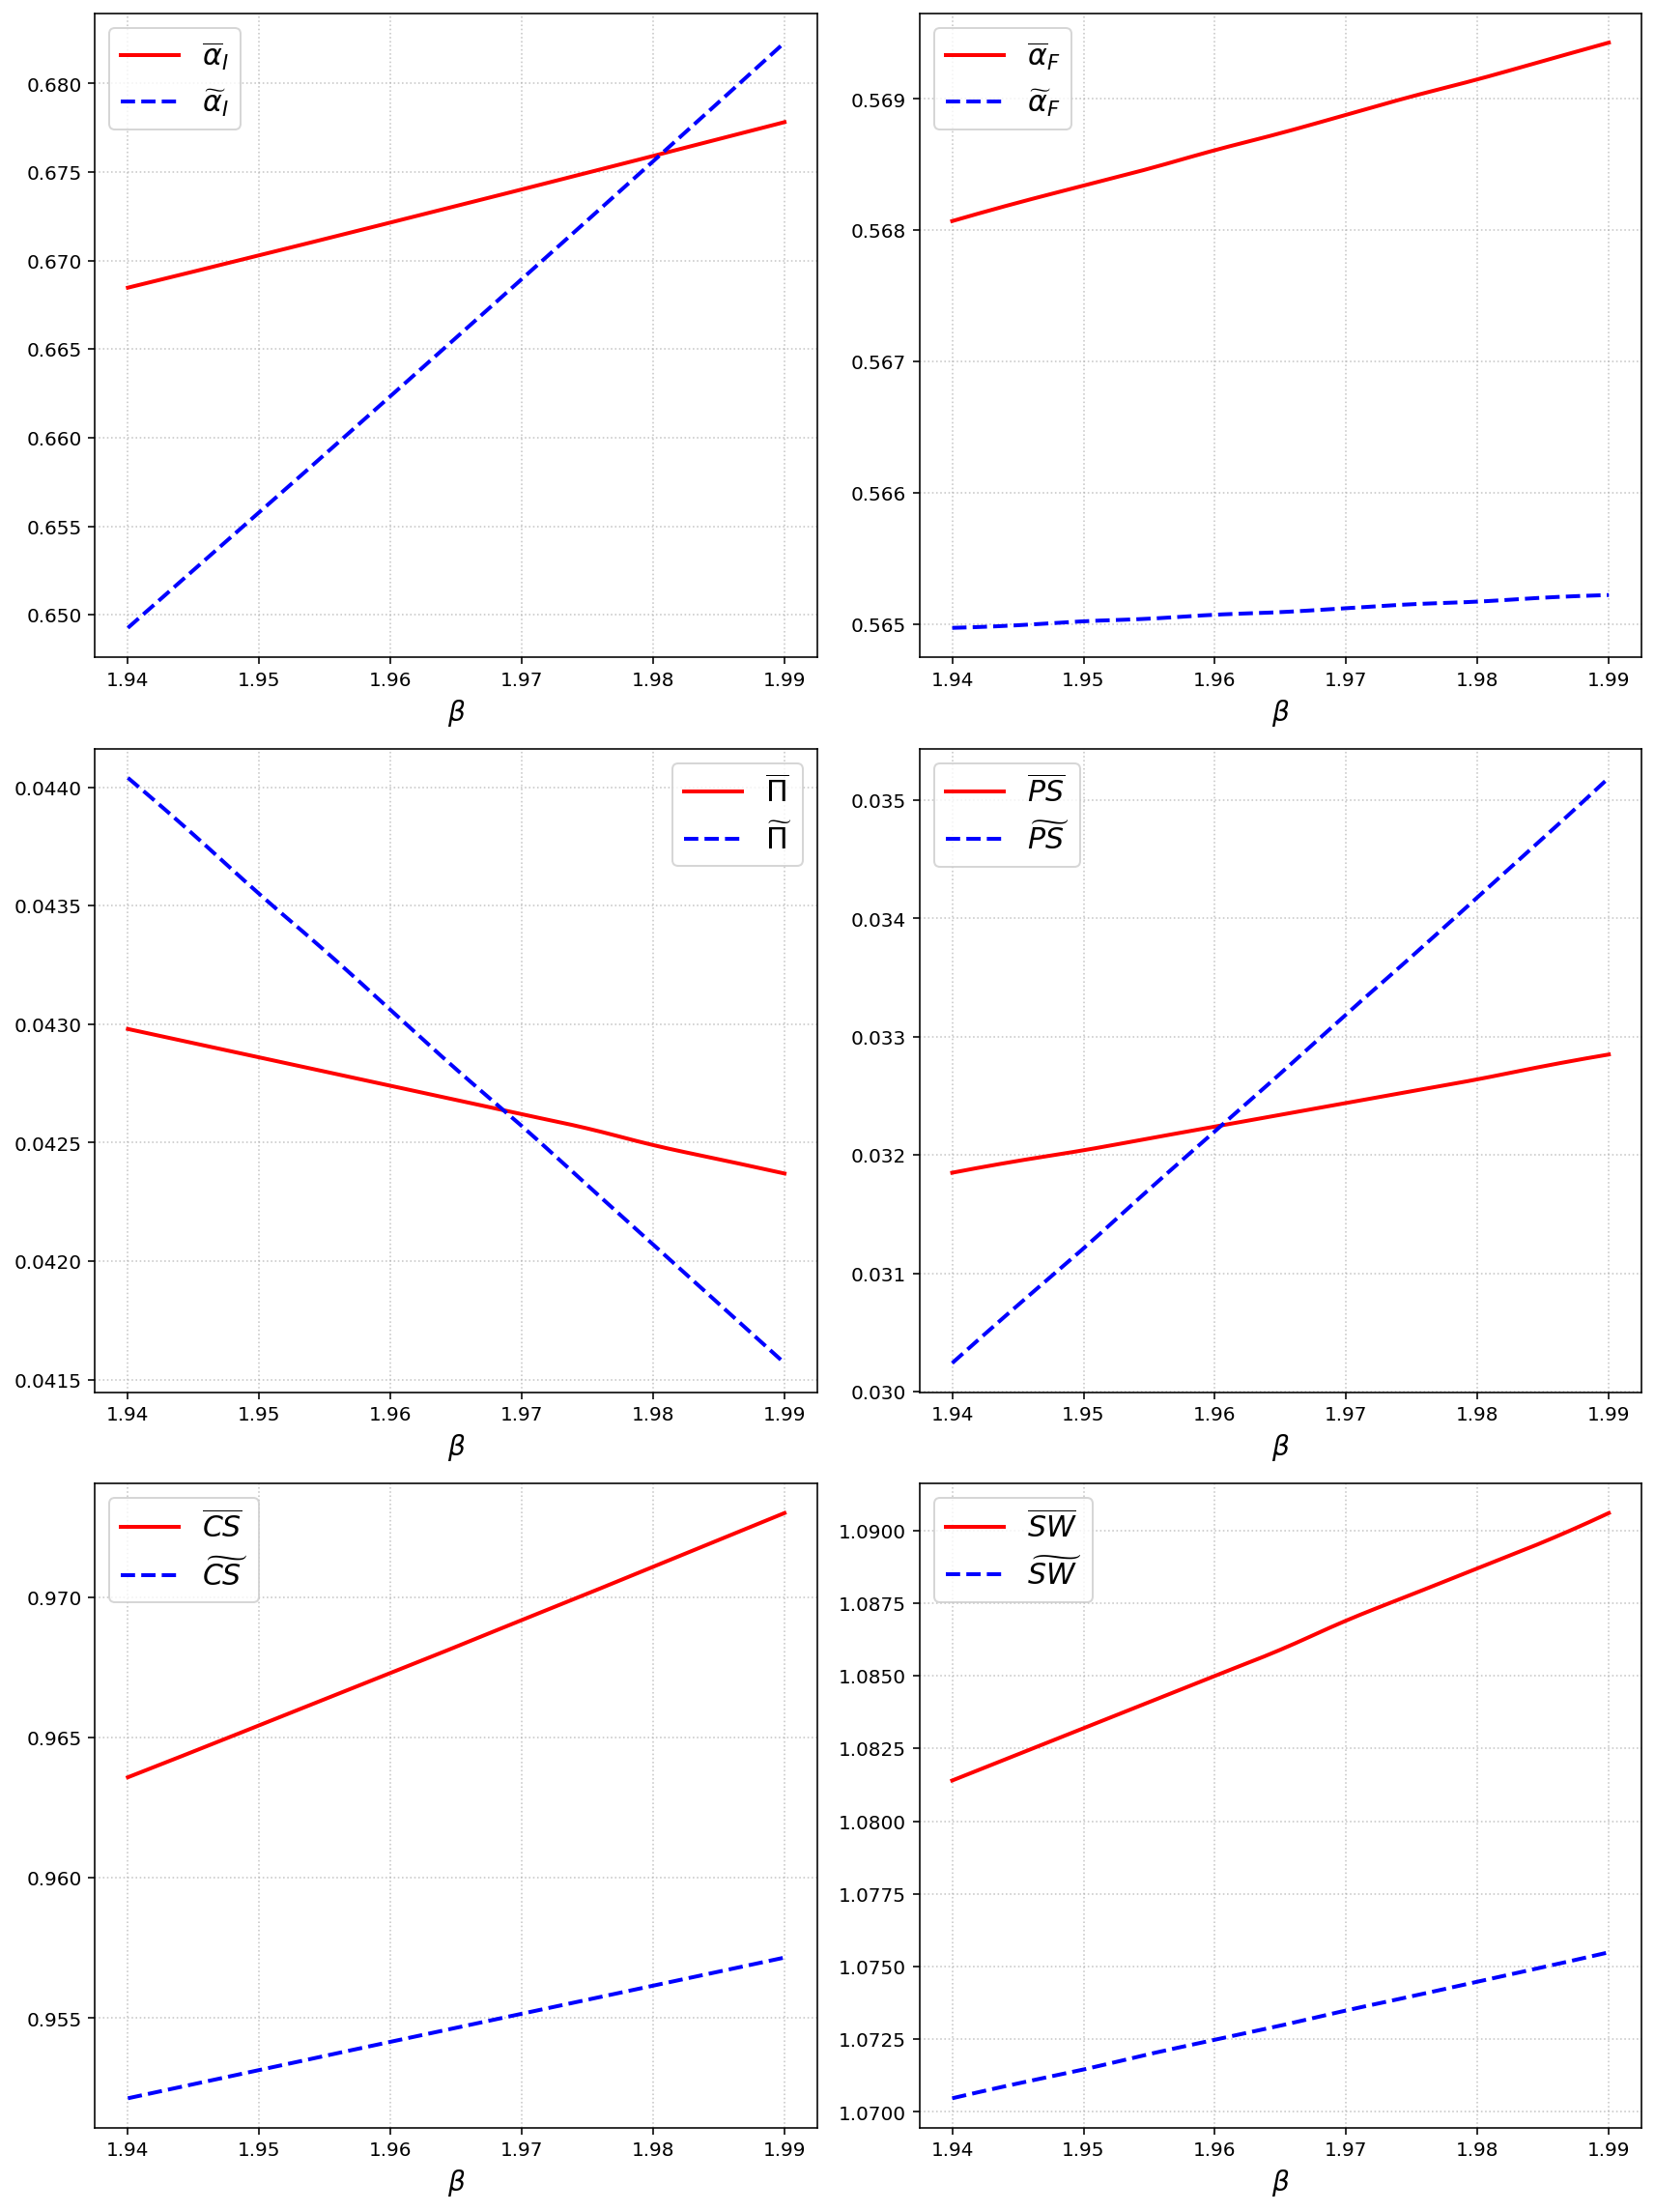


## Part F: Original Content Produced by Platforms

This part investigates the scenario where platforms offer consumers not only content from independent third-party providers but also their own original content. For ease of exposition, we assume that platforms can recruit their own content providers, whose output constitutes the platforms’ original content. A focal consumer located at receives the following utilities from joining platform and platform , respectively:

, (F1)

, (F2)

where is the base value of each platform. and represent the scale of original content providers owned by platform and the number of third-party providers, respectively. denotes consumers’ marginal valuation for content.

A focal provider located at receives the following utilities from joining platform and platform , respectively:

, (F3)

, (F4)

where captures the same-side network effect.

The profit functions for the platforms are given by

, (F5)

, (F6)

where is the marginal production cost of originals, and and respectively represent the platform’s revenue from and the cost of its original content. When determining their ad revenue-sharing rates , platforms simultaneously choose the numbers of their original content providers ().

Following the analysis in the main model, we focus on the pure-strategy equilibrium characterized by positive revenue-sharing rates, full coverage on both sides of the platform, and partial multihoming in the provider market. Other assumptions remain the same as those in the main model.

### Neither Platform Imposes Exclusivity ()

Under nonexclusive contracts, given the consumers’ utility functions in (F1) and (F2), the numbers of consumers on each platform are given by

, (F7)

. (F8)

Given providers’ utility functions in (F3) and (F4), the numbers of third-part providers on each platform are given by

, (F9)

. (F10)

Simultaneously solving (F7)~(F10) gives the following market sizes as functions of the ad revenue-sharing rates:

*,*

*,*

*,*

.

Next, the platforms choose their ad revenue-sharing rates and the scale of original content to maximize their profits as specified in (F5) and (F6). The first-order conditions with respect to and jointly lead to and , where . Note that when the parameter constraint defined in (F15) holds, the Hessian matrix of the platforms’ profit functions are negative semidefinite, i.e., . Thus, the second-order condition is satisfied.

The equilibrium ad revenue-sharing rates, quantities of original content, market sizes, and profits are as follows:

,

,

,

,

.

The equilibrium consumer surplus, providers’ total surplus, and social welfare can be given by

,

,

.

Following the main analysis, a pure strategy equilibrium with full market coverage on both sides of the platform and partial multihoming on the provider side exists only when , , and . These conditions impose constraints on , given by

, (F11)

where , , , and .

### Either or Both Platforms Impose Exclusivity ()

Under exclusive contracts, the numbers of third-party providers on each platform are given by

(F12)

. (F13)

Simultaneously solving (F7)~(F8), and (F12)~(F13), gives the following market sizes as functions of the ad revenue-sharing rates:

*,*

*,*

*,*

.

Next, the platforms choose their ad revenue-sharing rates and the scale of original content to maximize their profits in (F5) and (F6). Following the analysis under nonexclusive contracts, when the parameter constraint defined in (F15) holds, the second-order condition is satisfied.

The equilibrium ad revenue-sharing rates, quantities of original content, market sizes, and profits are as follows:

,

,

,

,

.

The equilibrium consumer surplus, providers’ total surplus, and social welfare can be given by

,

,

,

,

.

Following the main analysis, a pure strategy equilibrium with full coverage on both sides of the platform exists only when , , and . These conditions put constraints on , given by

. (F14)

For the rest of our analysis, we assume that constraints defined in (F11) and (F14) hold simultaneously. The region defined by (F11) and (F14) can be rewritten as follows:

, (F15)

where and . The constraint (F15) holds in the following proof.

Next, we examine the impact of exclusivity on the platforms’ ad revenue-sharing incentives.

**Proposition F1.** *When consumers’ marginal valuation for content is low (high), platforms’ optimal ad revenue-sharing rates under exclusive contracts are lower (higher) than under nonexclusive contracts. Mathematically, there exists , such that if , and if .*

**Proof of Proposition F1**. We examine how exclusive contracts impact ad revenue-sharing rates by comparing with , where and . Plugging in, when (and when ), where . Conditional on (F15), . Thus, when (andwhen)*.* This completes the proof of Proposition F1. □

Next, we examine the platforms’ preference for exclusivity.

**Proposition F2.** *Exclusive contracts will increase (decrease) platforms’ profits if consumers’ marginal valuation for content is low (high). Mathematically, there exists a threshold such that if , and if .*

**Proof of Proposition F2**. We examine how exclusive contracts impact platforms’ profits by comparing with , where and . Plugging in, when (and when ), where . Conditional on (F15), one can verify that . That is, decreases in . Further, we get that and can be positive or negative. Thus, decreases or first increases and then decreases in . Following similar steps, we can verify that decreases or first increases and then decreases in . Furthermore, we have and can be positive or negative. Thus, there exists a threshold such that (i.e., ) if and (i.e., ) if . This completes the proof of Proposition F2. □

**Corollary F1.** *Exclusive contracts emerge as the equilibrium only when .*

**Proof of Corollary F1.** Exclusive contracts arise as the equilibrium when . From the proof of Proposition F2, exclusive contracts emerge as the equilibrium only when . This completes the proof of Corollary F1. □

**Proposition F3.** *When exclusivity is the equilibrium (i.e., ), exclusive contracts will decrease (increase) providers’ total surplus if consumers’ marginal valuation for content is low (high). Mathematically, there exists a threshold such that if , and if .*

**Proof of Proposition F3**. We examine how exclusive contracts impact content providers’ total surplus by comparing with , where and . Plugging in, when (and when ), where . Define , where Let , , and be the solutions of . We have when or (and when or ). Thus, we depict the analysis into four cases. First, given , . Thus, increases in . We have given . Thus, decreases in . One can show that and can be positive or negative. Thus, increases or first increases and then decreases in . Furthermore, we can verify that and . Thus, increases in when . One can also verify that and . Therefore, there exists a threshold such that when and when ; Second, given , . Thus, decreases in . and can be positive or negative. Thus, decreases, increases, or first increases and then decreases in . Following similar steps, we can verify that increases, decreases, or first decreases and then increases in when . One can also verify that and there can happen . Therefore, there exists a threshold such that when and when ; Third, given , . Thus, increases in . Following the analysis when , we can verify that , , and decreases, increases, or first decreases and then increases in . One can also verify that and there can happen . Therefore, there exists a threshold such that when and when ; Fourth, given , . Thus, decreases in . Note that and . Thus, decreases in . Note also that and . Thus, decreases in . Following similar steps, we can show that decreases in when . and . Thus, when . In summary, there exists a threshold such that when and when . This ends the proof of Proposition F3. □

**Proposition F4.** Exclusive contracts can achieve a win-win outcome for platforms and content providers when *consumers’* marginal valuation for content is moderate. Mathematically,  *and when .*

**Proof of proposition F4**. By combining the results of Propositions F2 and F3, one can derive the results. This ends the proof of Proposition F4. □

Next, we examine the impact of exclusivity on platforms’ production of their original content.

**Proposition F5.** *When consumers’ marginal valuation for content is low (high), platforms’ optimal amount of original content under exclusive contracts is lower (higher) than under nonexclusive contracts. Mathematically, there exists such that if , and if .*

**Proof of proposition F5**. We examine how exclusive contracts impact platforms’ incentives to invest in original content by comparing with , where and . Plugging in, when (and when ), where . Conditional on (F15), . Let and be the two solutions of . Then, when or and when . One can verify that and can locate within the feasible region. Thus, we get that if and if . This ends the proof of Proposition F5. □

In summary, our analysis reveals that, upon integrating platforms’ decisions on original content, the main results regarding the platforms’ and providers’ preferences for exclusivity hold qualitatively the same. Relative to nonexclusive contracts, platforms prefer exclusivity when the marginal consumer valuation for content () is low and prefer nonexclusive when is high; exclusivity can lead to a win-win outcome for platforms and third-party providers at intermediate .

In addition, the new choice yields new insights into platforms’ incentives to invest in original content. Specifically, relative to nonexclusive contracts, the platforms’ optimal amount of original content is higher under exclusivity when is high, and lower when is low. The intuition also lies in the interplay between the direct effect and the strategic effect of exclusivity. Exclusivity reduces the number of third-party providers on each platform, lowering per-platform content value. When is high, the platform’s return to rebuilding the total provider or content base ()​ is large, so the platform both raises its revenue-sharing rate​ (to retain third-party providers) and expands ​(to produce more original content). That is, the direct effect of exclusivity dominates. Conversely, when is low, the reduction in the number of third-party content providers per platform due to exclusivity is less important. The strategic effect dominates—exclusivity makes revenue sharing a less effective lever for stealing providers, so when is low, platforms optimally lower their revenue-sharing rates and**​** reduce the recruitment of in‑house content providers relative to nonexclusive contracts.

## Part G: Providers’ Multihoming Costs

This part examines a scenario where content providers incur extra costs if they choose to multi-home. All other assumptions remain consistent with those in the main model. Under the condition that neither platform enforces exclusivity, each content provider can choose from one of the three options listed below:

(i) Only join platform : . (G1)

(ii) Only join platform : . (G2)

(iii) Join both platforms and : , (G3)

where denotes the cost incurred by providers for multihoming. When is sufficiently high, no provider engages in multihoming, even in the absence of exclusivity requirement by either platform. Consequently, we focus on the more relevant case in which is relatively low.

Given the above utility functions, content providers with will join platform and those with will join platform . The number of consumers and content providers joining each platform can be expressed as follows:

,

,

,

.

The platforms’ profits can be written as

, (G4)

. (G5)

We use a bar above the variables () to denote the case of nonexclusive contracts. The equilibrium ad revenue-sharing rates, market sizes, and platforms’ profits are given by

,

,

,

.

Plugging in the equilibrium results, the consumer surplus, providers’ aggregate surplus, and social welfare can be given by

,

,

.

For the above equilibrium to exist, we need to ensure that the platforms share only a fraction of ad revenues with content providers, i.e., . Note also that exclusive contracts impact platform competition only when a subset of content providers multi-home under nonexclusive contracts, i.e., . These conditions put constraints on , , and , given by

, , and , (G6)

where .

Under exclusive contracts, the equilibrium outcomes are the same as those in the main model.

Following the analysis in the main model, we focus on the pure-strategy equilibrium with positive revenue-sharing rates and full coverage on both sides of the platform. Specifically, throughout the rest of the analysis, the following parameter conditions are satisfied:

, (G7)

and

and . (G8)

Next, we examine the impact of exclusivity on the platforms’ revenue-sharing incentives.[[8]](#footnote-9)

**Proposition G1.** *When consumers’ marginal valuation for content is low (high), platforms’ optimal ad revenue-sharing rates under exclusive contracts are lower (higher) than under nonexclusive contracts. Mathematically, there exists , which increases in , such that if , and if .*

**Proof of Proposition G1.** We examine how exclusive contracts impact ad revenue-sharing rates by comparing with , where and . Plugging in, if (and if ). Following the proof of Proposition 1 of the main model, if (and if ). It is evident that increases in . This completes the proof of Proposition G1. □

**Proposition G2.** *Exclusive contracts will increase (decrease) platforms’ profits if consumers’ marginal valuation for content is low (high). Mathematically, there exists a threshold , which increases in , such that if , and if .*

**Proof of Proposition G2.** We examine how exclusive contracts impact platforms’ profits by comparing with , where and . Plugging in, when (and when ), where . Conditional on , we have . That is, increases in . We can also get that and . Thus, first decreases and then increases in . Further, we can verify that and . Thus, there exists a threshold such that (i.e., ) if and (i.e., ) if .

Next, we prove that increases in . Following the proof of Proposition D2, one can rewrite as . Then, when and when . One can verify that there exists a threshold value such that (i.e., ) when and (i.e., ) when . As proved previously, when and when . Thus, is the inverse function of . For any and , holds if and only if ( holds if and only if ). Assuming that and , we have and . Note also equals to . Thus, increases in . This ends the proof of Proposition G2. □

**Corollary G1.** *Exclusive contracts emerge as the equilibrium only when .*

**Proof of Corollary G1.** Exclusive contracts arise as the equilibrium when . From the proof of Proposition G2, exclusive contracts emerge as the equilibrium only when . This completes the proof of Corollary G1. □

**Proposition G3.** *When exclusivity is the equilibrium (i.e., ), exclusive contracts will decrease (increase) providers’ total surplus if consumers’ marginal valuation for content is low (high). Mathematically, there exists a threshold , which increases in , such that if , and if .*

**Proof of Proposition G3.** We examine how exclusive contracts impact content providers’ total surplus by comparing with , where and . Plugging in, we have when , where . Following the proof of Proposition 3 of the main model, we depict the analysis into two cases. First, given . ; Second, given . when (and when ), where Conditional on , one can verify that . That is, decreases in . Following similar steps, we can verify that increases, first increases and then decreases, or first decreases and then increases and then decreases in . Further, one can show that , can be positive or negative, and there can happen . Thus, there exist thresholds and () such that (i.e., ) when and (i.e., ) when or . Following the proof in the main model, we can show that . Thus, given , when and when .

Next, we prove that increases in . Following the proof of Proposition 3 in the main model, rewriting as . Then, when and when . The feasible region can be rewritten as . We can verify that there exists a threshold value such that (i.e., ) when and (i.e., ) when . As proved previously, when and when . Thus, is the inverse function of . For any and , holds if and only if ( holds if and only if ). Assuming that and , we have and . Note also equals to . Thus, increases in . This completes the proof of Proposition G3. □

**Proposition G4.** Exclusive contracts can achieve a win-win outcome for platforms and content providers when *consumers’* marginal valuation for content is moderate. Mathematically,  *and when .*

**Proof of proposition G4**. By combining the results of Propositions G2 and G3, one can derive the results. This ends the proof of Proposition G4. □

**Proposition G5.** *When content exclusivity arises as the equilibrium (i.e., when ), we get:*

1. *Exclusive contracts reduce the consumer surplus, i.e., ;*
2. *Exclusive contracts reduce (increase) social welfare when consumers’ marginal valuation for content is low (high). Mathematically, there exists a threshold such that if , and*  *if* .

**Proof of proposition G5**. (a) We first compare with , where and . Plugging in, we have when . Thus, if (and if ). Conditional on , holds.

(b) Next, we compare with . We have if (and if ), where and . Let , , and be the three solutions of . Then, when or . Note also that when . Following the proof of Proposition 5 of the main model, we can depict the following analysis into four cases. First, given , and . Thus, when (and when ), where . Conditional on , we can verify that. Hence, when ; Second, given , and . Thus, we get that when ; Third, given , this region always locates outside our feasible region; Fourth, given , and Thus, when (and when ). Conditional on , we have . Thus, increases in . Further, we can verify that and can hold.[[9]](#footnote-10) Thus, there exists a threshold such that (i.e., ) if and (i.e., ) if . By summarizing the above results, we get that if and if . This ends the proof of Proposition G5. □

In summary, the key findings regarding the impacts of exclusivity remain qualitatively the same as in the main model. Specifically, the platforms’ optimal ad revenue-sharing rates under exclusive contracts are higher (lower) than those under nonexclusive contracts when consumers’ marginal valuation for content () is high (low). Exclusive contracts benefit the platforms only when is not high. Exclusivity can lead to a win-win outcome for platforms and content providers when is intermediate. Intuitively, reduces multihoming in the nonexclusive regime, which dampens the platforms’ loss in the number of providers due to switching to exclusivity but does not overturn the organizing trade-off between the direct (less same-side crowding) and strategic (revenue sharing is a less effective lever to attract providers) effects. So, our main results and insights remain qualitatively robust.

## Part H: Exclusivity Monitoring Costs

Our main model assumes that platforms implement exclusivity without incurring any costs. This part investigates a scenario in which exclusivity imposes some positive monitoring cost on each platform. We assume that each platform incurs a monitoring cost for each content provider. Thus, platform ’s profit under exclusive contracts can be rewritten as

, (H1)

where denotes platform ’s total monitoring cost. When , this extension collapses to the main model. Obviously, when is extremely high, neither platform has an incentive to implement exclusivity. We focus on a more relevant case in which is positive but not extremely high, enabling platform competition and ensuring full coverage of the provider market under exclusive contracts. All other assumptions are the same as those in the main model. To examine the impact of exclusivity, we focus on the case with full coverage on both sides of the platform and partial multihoming in the provider market.

Under nonexclusive contracts, the equilibrium results are the same as those in the main model. The platforms’ ad revenue-sharing rates, market sizes, and profits are as follows:

,

,

,

.

The above equilibrium exists when (A4) holds.

Under exclusive contracts, the platforms choose their optimal ad revenue-sharing rates to maximize their problems defined in (H1). The equilibrium ad revenue-sharing rates, market sizes, and profits are as follows:

,

,

,

.

The consumer surplus, providers’ aggregate surplus, and social welfare can be given by

,

,

.

Two conditions must be met for the above equilibrium to be valid. First, we need to guarantee full participation on the provider side; that is, the indifferent participant located at on the provider side must have a nonnegative net surplus in equilibrium, i.e., ; Second, the platforms only share a fraction of their ad revenues with content providers, i.e., ; Third, the platforms obtain positive profits, i.e., . Given (A4), these conditions put additional constraints on and , given by and . Following the analysis in the main model, we verify that, given the above constrains, no kink equilibrium emerges, and the aforementioned outcomes constitute the unique and stable Nash equilibrium, characterized by a fully covered provider market under exclusive contracts

Following the analysis of the main model, we focus on the pure-strategy equilibrium characterized by positive revenue-sharing rates, full provider coverage, and partial multihoming. Accordingly, for the rest of our analysis, the following constraints hold:

, , and . (H2)

We first examine how exclusivity impacts the platforms’ ad revenue-sharing incentives.[[10]](#footnote-11)

**Proposition H1.** *When consumers’ marginal valuation for content is low or high, the platforms’ optimal ad revenue-sharing rates under exclusive contracts are lower than under nonexclusive contracts; when consumers’ marginal valuation for content is medium, the platforms’ optimal ad revenue-sharing rates under exclusive contracts are higher than under nonexclusive contracts. Mathematically, there exist thresholds and such that if*  *or* *, and if .*

**Proof of Proposition H1**. We examine how exclusive contracts impact ad revenue-sharing rates by comparing with , where and . Plugging in, we get that when . Conditional on (H2), . That is, decreases in . We have can be positive or negative, and . Thus, decreases or first increases and then decreases in . Following similar steps, we can verify that increases, first decreases and then increases, or first increases and then decreases in . Furthermore, we have , can be negative or positive, and there can happen . Thus, there exist thresholdsandsuch that(i.e., )ifor, and(i.e., )if.This completes the proof of Proposition H1. □

Note that the result regarding on the impact of exclusivity on platforms’ revenue-sharing incentives differs from that in the main model. This is because monitoring costs reduces the platforms’ motivation to share ad revenue with providers under exclusive contracts. This effect is amplified as increases. Thus, the direct effect may be dominated by the strategic effect when is high, leading to higher ad revenue-sharing rates under exclusive contracts compared to nonexclusive contracts.

Next, we examine the impact of exclusivity on the platforms’ preference for exclusivity.

**Proposition H2.** *Exclusive contracts will increase platforms’ profits if consumers’ marginal valuation for content is low or high, and decrease platforms’ profits if consumers’ marginal valuation for content is medium. Mathematically, there exist thresholds and such that if*  *or* *, and if .*

**Proof of Proposition H2**. We examine how exclusive contracts impact platforms’ profits by comparing with , where and . Plugging in, we have when (and when ), where . Conditional on , . That is, increases in . Note that and can be negative and positive. Thus, increases or first decreases and then increases in . Following similar steps, one can verify that increases or first decreases and then increases in . Note that and can be negative and positive. Thus, increases or first decreases and then increases in . Furthermore, and can be positive or negative, and there can happen . Thus, there exist thresholds and such that (i.e., ) when or and (i.e., ) when . This completes the proof of Proposition H2. □

**Corollary H1.** *Exclusive contracts emerge as the equilibrium when*  *or* *.*

**Proof of Corollary H1.** Exclusive contracts arise as the equilibrium when . From the proof of Proposition H2, exclusive contracts emerge as the equilibrium when or . This completes the proof of Corollary H1. □

**Proposition H3.** *When content exclusivity arises as the equilibrium, exclusive contracts will decrease providers’ total surplus if consumers’ marginal valuation for content is low or high, and increase providers’ total surplus if consumers’ marginal valuation for content is medium. Mathematically, there exist thresholds and such that if or, and if .*

**Proof of Proposition H3**. We examine how exclusive contracts impact content providers’ total surplus by comparing with , where and . Plugging in, we have when , where . Let and be the two solutions of . Then, when or (and when ). One can show that and can locate within the feasible region. We depict the analysis into two cases. First, given , . Thus, ; Second, given , . Thus, when (and when ), where Conditional on , one can verify that . That is, decreases in . Note also and . Hence, first increases and then decreases in . Further, one can show that and can be negative, and there can happen . Thus, there exist thresholds and () such that (i.e., ) when and (i.e., ) when or . Moreover, one can verify that and can locate within . Thus, when orandwhen. This ends the proof of Proposition H3.

**Proposition H4.** Exclusive contracts can achieve a win-win outcome for platforms and content providers when consumers’ marginal valuation for content is relatively medium. Mathematically,  *and when or .*

**Proof of proposition H4**. By combining the results of Propositions H2 and H3, one can derive the results. This ends the proof of Proposition H4. □

**Proposition H5.** *When content exclusivity arises as the equilibrium, we get:*

1. *Exclusive contracts reduce the consumer surplus, i.e., ;*
2. *Exclusive contracts reduce (increase) social welfare when consumers’ marginal valuation for content is low (high). Mathematically, there exists a threshold such that if , and*  *if* .

**Proof of proposition H5**. (a) We first compare with , where and . Plugging in, we have . Note that increases in . Conditional on (H2), we have . That is, .

(b) Next, we compare with , where and . Plugging in, we have , where and . Let and be the two solutions of . Then, when or . Note also that when . Following the proof of Proposition 5 of the main model, we can depict the following analysis into four cases. First, given , and . Thus, when (and when ), where . Conditional on , we can verify that. Hence, when ; Second, given , and . Thus, we get that when ; Third, given , this region always locates outside our feasible region; Fourth, given , and Thus, when (and when ). Conditional on , we have . Thus, increases in . Further, we can verify that and can hold.[[11]](#footnote-12) Thus, there exists a threshold such that (i.e., ) if and (i.e., ) if . By summarizing the above results, we get that if and if . This completes the proof of Proposition H5. □

In summary, our analysis shows that—unlike the main model, where exclusive contracts raise the platforms’ profits only when consumers’ marginal valuation for content ( is low—introducing per-provider monitoring costs yields profit gains at low and also at relatively high . Monitoring expenses make revenue sharing a costlier and less effective instrument under exclusivity, so optimal revenue-sharing rates are held down, amplifying the strategic effect (reduced compensation competition). Nevertheless, an intermediate region remains in which exclusivity is Pareto-improving for both platforms and providers, which is consistent with the main model.

## Part I: Diminishing Returns of Content

This part investigates the scenario in which consumers obtain diminishing returns from additional providers on platforms. Specifically, a focal consumer located at receives the following utilities from joining platform and platform , respectively:

, (I1)

, (I2)

where the term denotes the consumer’s total benefit from accessing content on platform . Each consumer’s marginal benefit from joining the platforms decreases as the number of providers increases. The total number of consumers joining each platform can be given by

, (I3)

. (I4)

The providers’ utility functions and other assumptions are the same as those in the main model.

Under nonexclusive contracts, the number of providers joining each platform can be given by

, (I5)

. (I6)

Simultaneously solving (I3)~(I6) gives the numbers of consumers and providers joining each platform. The platforms choose their ad revenue-sharing rates to maximize profits as follows:

, (I7)

. (I8)

Under exclusive contracts, the number of providers joining each platform can be given by

, (I9)

. (I10)

Simultaneously solving (I3), (I4), (I9), and (I10) gives the numbers of consumers and providers joining each platform. The platforms choose their ad revenue-sharing rates to maximize profits as described in (I7) and (I8).

Due to analytical complexity, we cannot derive closed-form solutions; so we solve numerically and compare equilibria under nonexclusive contracts and exclusive contracts across broad parameter grids. Figure I1 provides a visual illustration of our findings. We show that the key results regarding the platforms’ incentives to compensate providers and their preferences for exclusivity remain qualitatively unchanged. Specifically, the platforms share more ad revenue with providers under exclusive contracts only when (marginal consumer valuation for content) is high. Exclusivity emerges as an equilibrium when is low. Exclusive contracts lead to a win-win outcome for platforms and providers when is intermediate. Diminishing returns dampen the direct demand gain from adding providers and simultaneously make revenue sharing a less effective instrument for attracting providers across platforms (i.e., it softens compensation competition). The same two forces of exclusivity from the main model remain operative—the direct effect (exclusivity alleviates same-side crowding) and the strategic effect (the marginal effectiveness of adjusting the revenue-sharing rate to attract providers declines)—so the ordering of regions is unchanged even though the numeric thresholds shift.

**Figure I1. Impacts of Exclusive Contracts**

**()**


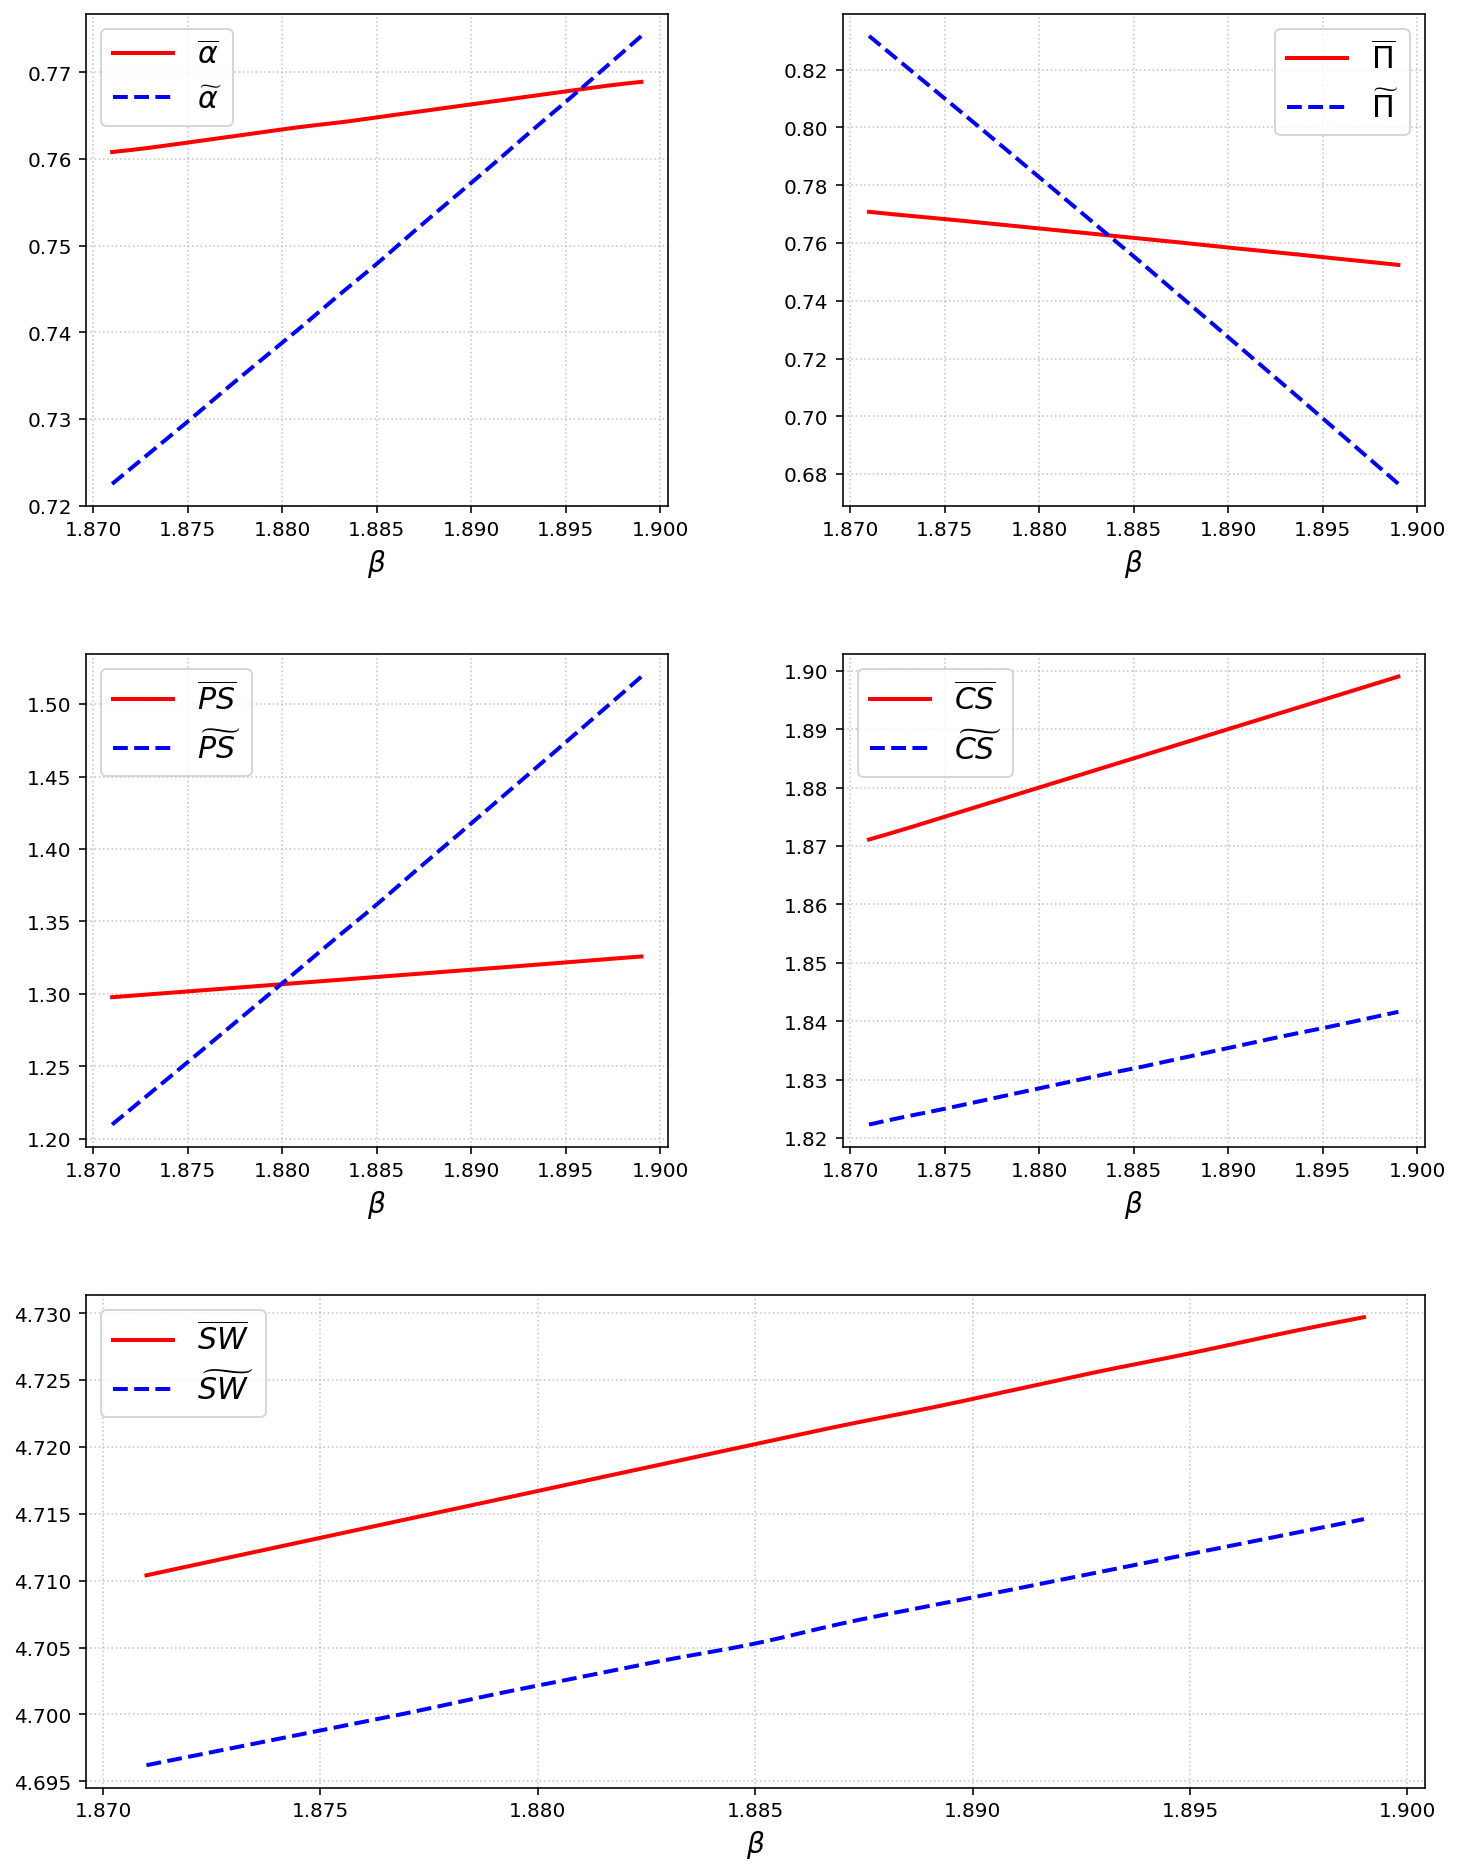


## Part J: Asymmetric Platform Base Values

This part investigates the scenario in which the platforms deliver asymmetric base values to consumers. Specifically, a focal consumer located at receives the following utilities from joining platform and platform , respectively:

, (J1)

, (J2)

where denotes the base value provided by platform . We assume that is sufficiently high such that, in equilibrium, the consumer market is fully covered. Let denote the difference in base values. When is very high, platform will be driven out of the consumer market. So, we focus on the non-degenerate case where is not very high, allowing both platforms to remain profitable in the market. The total number of consumers joining each platform can be given by

, (J3)

. (J4)

The providers’ utility functions and other assumptions are the same as those in the main model.

Under nonexclusive contracts, the number of providers joining each platform can be given by

, (J5)

. (J6)

Simultaneously solving (J3)~(J6) gives the following numbers of consumers and providers joining each platform:

,

,

,

.

The platforms choose their ad revenue-sharing rates to maximize their profits as below:

, (J7)

. (J8)

The two platforms’ ad revenue-sharing rates, market sizes, and profits as follows:

,

,

,

,

.

Following the analysis in the main model, we focus on the case with full coverage on both sides of the platform and partial multihoming in the provider market. Note that platforms share only a fraction of ad revenues with content providers, i.e., . Note also that exclusive contracts affect platform competition only when a subset of content providers multi-home under nonexclusive contracts, i.e., . Additionally, neither platform dominates the consumer market, i.e., . These conditions lead to the following constraints:

, , and (J9)

or

, , and . (J10)

Under exclusive contracts, the number of providers joining each platform can be given by

, (J11)

. (J12)

Simultaneously solving (J3), (J4), (J11), and (J12) gives the following numbers of consumers and providers joining each platform:

,

,

,

.

The platforms choose their ad revenue-sharing rates to maximize their profits in (J7) and (J8).

Due to analytical complexity, we cannot derive the closed-form results. We employ numerical analysis to present our findings. Figure J1 visually present our findings. First, platforms set higher ad revenue-sharing rates under exclusive contracts compared to nonexclusive contracts when consumers’ marginal valuation for content is high. Second, platforms obtain higher profits under exclusive contracts than under nonexclusive contracts when consumers’ marginal valuation for content () is not very high (i.e., for each platform , there exists a threshold value such that if ). Third, in equilibrium, exclusive contracts can lead to a win-win outcome for both platforms and providers when consumers’ marginal valuation for content is medium. In conclusion, our key results regarding the impacts of exclusivity remain qualitatively consistent with those in the main model.

We also gain some new insights into the impact of (i.e., the asymmetry in platform base value) on platforms’ incentives to adopt exclusive contracts. As shown in Figure J2, the threshold value decreases with , while first increases and then decreases with . In other words, as increases, platform becomes less inclined to choose exclusivity, whereas platform ’s inclination may either increase or decrease, depending on the magnitude of . The intuition is as follows. Note that a higher shifts consumers toward platform (larger and smaller ). Exclusivity reduces the number of providers on each platform, and the associated profit loss from this reduction is proportional to . Hence, as rises with , platform ’s loss gets heavier, while the strategic gain (softer compensation competition) does *not* scale up one-for-one with ​. This makes platform less inclined to adopt exclusivity as grows (i.e., falls). By contrast, for platform , the two forces move in opposite directions as increases: (1) The loss from the reduction in the number of providers gets worse under exclusivity (hurts platform ), and (2) the strategic relief from compensation competition becomes more valuable when platform is weaker (benefits platform ). When is small, the second force dominates, increasing platform ’s incentive to adopt exclusive contracts. Conversely, when is large, the first force prevails, making exclusivity less attractive to platform .

**Figure J1. Impacts of Exclusive Contracts**

**()**


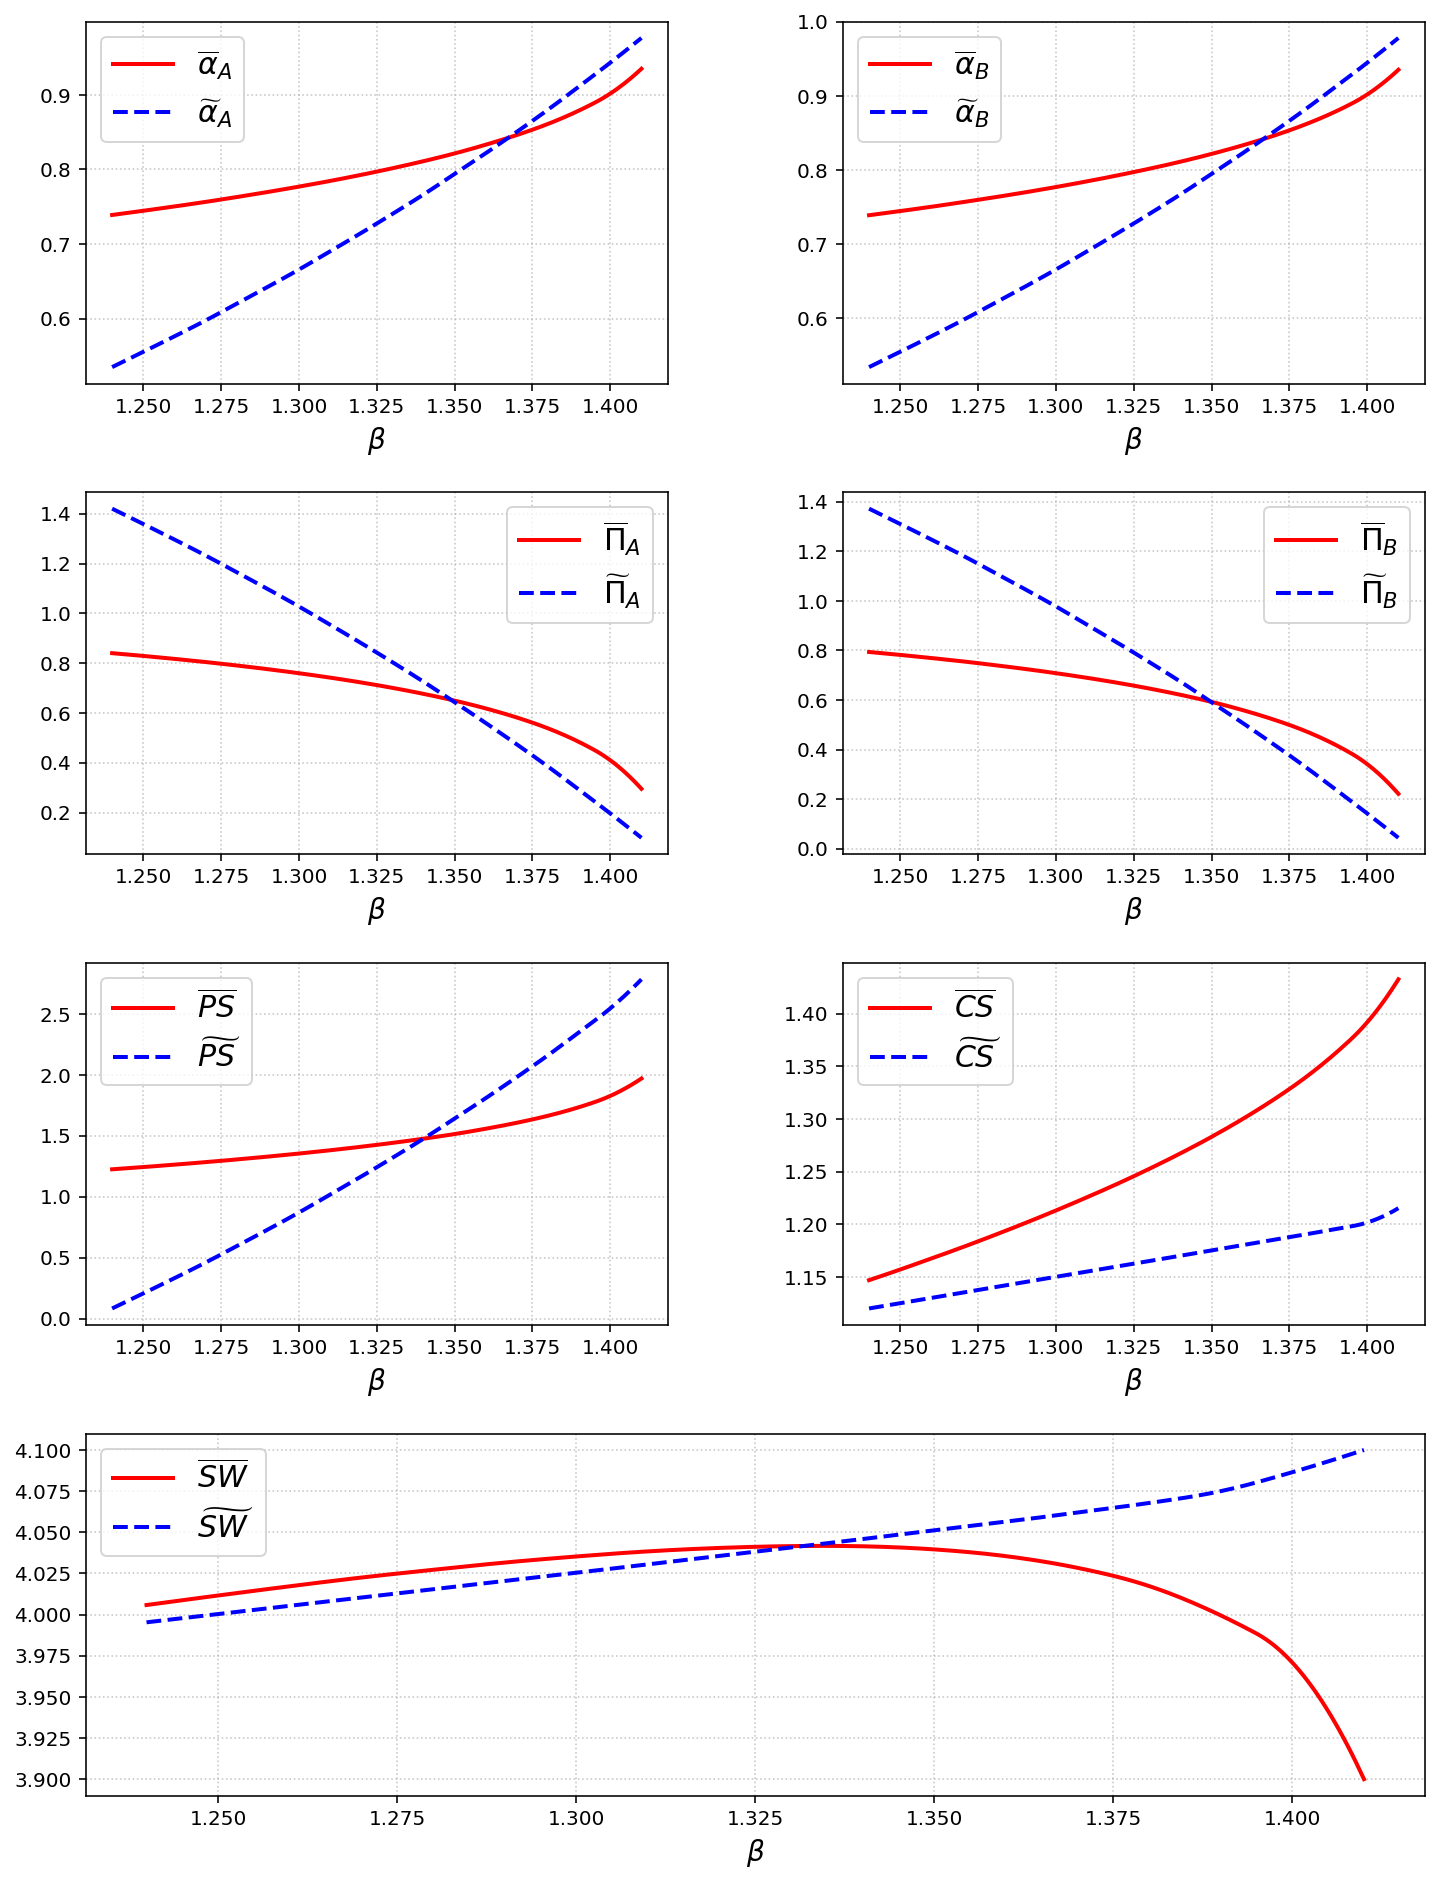


**Figure J2. Impact of on Platforms’ Incentives to Impose Exclusivity**

**()**

Threshold value

Threshold value

## Part K: Asymmetric Marginal Ad Revenues

This part investigates the scenario in which platforms have different marginal ad revenues. Specifically, we assume that the marginal ad revenue per consumer is for platform and for platform , where . Note that if is sufficiently low, the minimal received ad revenue causes no provider to join platform in equilibrium under exclusive contracts, effectively excluding it from the market. Therefore, we focus on the more relevant case where is not excessively low. All other assumptions are the same as those in the main model.

Following the analysis in the main model, the total number of consumers joining each platform can be given by

, (K1)

. (K2)

A focal provider located at receives the following utilities from joining platform and platform , respectively:

,

.

Under nonexclusive contracts, the number of providers joining each platform can be given by

, (K3)

. (K4)

Simultaneously solving (K1)~(K4) gives the following numbers of consumers and providers joining each platform

,

,

,

.

The platforms choose their ad revenue-sharing rates to maximize their profits as follows:

, (K5)

. (K6)

Define , , , and . The platforms’ optimal ad revenue-sharing rates and market sizes are as follows:

,

,

,

,

,

.

Plugging in, the platforms’ profits are given by

,

.

The provider’s total surplus is given by

.

For the above equilibrium to exist, first, we need to ensure that platforms share only a fraction of ad revenues with content providers, i.e., , . Second, exclusive contracts impact platform competition only when a subset of content providers multi-home in the nonexclusive case, i.e., . Third, the consumer market is fully covered, and no platform can dominate the market, i.e., , .

Under exclusive contracts, the number of providers joining each platform can be given by

, (K7)

. (K8)

Simultaneously solving (K1), (K2), (K7), and (K8) gives the following numbers of consumers and providers joining each platform

,

,

,

.

Plugging in, platforms choose their ad revenue-sharing rates to maximize their profits as given in (K5) and (K6).

Following the analysis in the main model, we focus on the case with full coverage on both sides of the platform and partial multihoming in the provider market. Due to analytical complexity, closed-form expressions become unwieldy, so we solve numerically across broad parameter grids and compare equilibria under nonexclusive contracts and exclusive contracts. Figure K1 illustrates our findings. Our numerical analysis shows that the key results regarding market participants’ preferences for exclusivity remain valid. For example, platforms obtain higher profits under exclusive contracts than under nonexclusive contracts when consumers’ marginal valuation for content is not very high (i.e., for each platform , there exists a threshold value such that if ).

We also obtain new insights into the impact of on platforms’ incentives to adopt exclusive contracts. Note that captures the degree of asymmetry in marginal ad revenue between the two platforms. A lower value of indicates a higher asymmetry level in marginal ad revenue between them. Our numerical analysis shows that the threshold values () decreases with . This means that asymmetry in marginal ad revenue strengthens platform incentives for exclusivity. The intuition is as follows. A lower means that platform monetizes each consumer *less*. This depresses platform ’s willingness/ability to compensate providers under nonexclusive contracts, so fewer providers multi-home (or they do so at lower effective payoffs). In other words, even without exclusivity, the market already behaves *more like* single-homing as decreases. This implies that moving to exclusivity entails a smaller loss from the reduced number of providers. Note that changes in have little effect on the strategic relief in compensation competition—exclusivity still makes revenue sharing a less effective lever to attract providers to the same extent. Thus, the incremental loss in the number of providers from moving to exclusivity is smaller, while the strategic relief in compensation competition remains. As a result, as decreases, exclusivity becomes more attractive to platforms.

**Figure K1. Impacts of Exclusive Contracts**

**()**


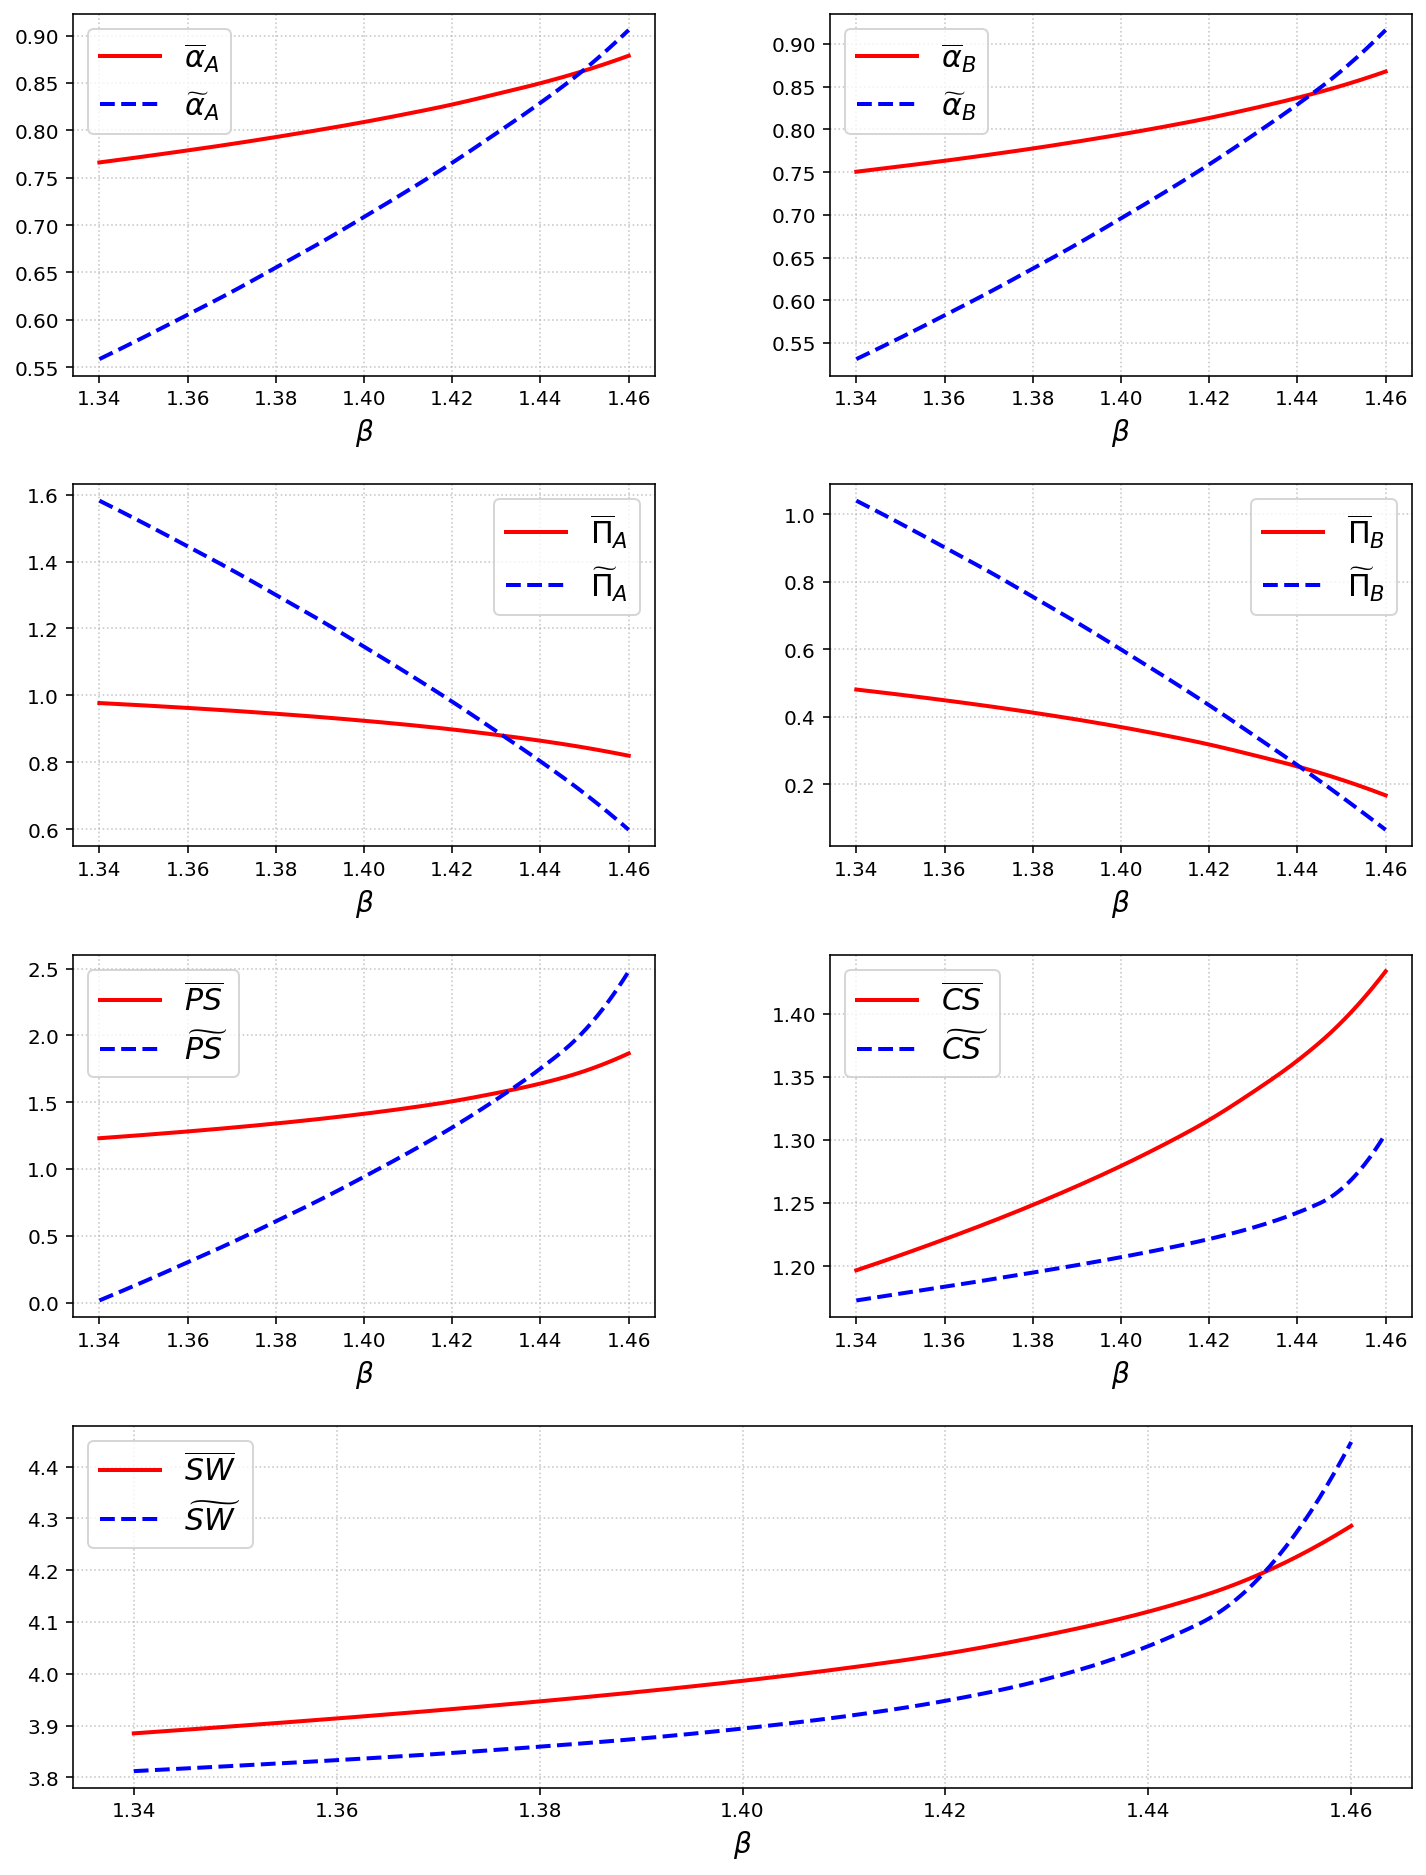


**Figure K2. Impact of on Platforms’ Incentives to Impose Exclusivity**

**()**

Threshold value

Threshold value

## Part L: Simultaneous Choice of Exclusivity and Ad Revenue-Sharing Rate

The main model assumes that platforms decide on exclusivity and ad revenue-sharing rates sequentially. This part examines the scenario in which the platforms simultaneously choose whether to adopt exclusivity and their ad revenue-sharing rates. All other aspects of the game follow the main model.

Following the analysis in the main model, we use a bar above the variables () to indicate the case of nonexclusive contracts and a tilde above the variables () to indicate the case with exclusive contracts. Give the rival’s decision, platform chooses and to maximize its profit. The platforms’ conditional profits can be given by

,

.

We first determine the platforms’ best-response strategies.

When platform adopts an exclusive contract and sets , platform chooses either or to maximize its profit. Platform ’s optimal ad revenue-sharing rates are . This implies that platform ’s optimal ad revenue-sharing rate is the same regardless of whether it adopts an exclusive or nonexclusive contract.

When platform adopts a nonexclusive contract and sets , platform chooses either or to maximize its profit. If platform adopts a nonexclusive contract, the optimal ad revenue-sharing rate is , and the corresponding conditional profit is . If platform instead adopts an exclusive contract, its optimal ad revenue-sharing rate is , and the corresponding conditional profit is . Platform adopts the exclusive contract only if . Thus, platform ’s best-response ad revenue-sharing rate can be given by

.

Following similar steps, platform ’s best-response revenue-sharing rate can be given by

.

Combining the platforms’ best-response functions, we get the following equilibrium outcomes:

(i) If holds, then only one platform imposes exclusivity in equilibrium. The platforms’ ad revenue-sharing rates are given by (or ), and their profits are (or ). Within the feasible region where a subset of providers multi-home and both sides of the platform are fully covered (i.e., the parameter constraint defined in (A13) holds), we have . Thus, no equilibrium exists in which either platform imposes exclusivity.

(ii) Both platforms imposing exclusivity always arises as an equilibrium. The platforms’ ad revenue-sharing rates and profits are and .

(iii) If holds, then neither platform imposes exclusivity in equilibrium. The platforms’ ad revenue-sharing rates and profits are and . Within the feasible region where a subset of providers multi-home and both sides of the platform are fully covered (i.e., the parameter constraint defined in (A13) holds), holds, indicating that neither platform imposing exclusivity always arises as an equilibrium.

In summary, when the platforms simultaneously choose whether to adopt exclusivity and their ad revenue-sharing rates, the qualitative implications of exclusivity remain unchanged. Specifically, our analysis demonstrates that in this scenario, two pure-strategy Nash equilibria can arise: one in which neither platform imposes exclusivity, and another in which both platforms do so. The equilibrium outcomes under exclusive and nonexclusive contracts remain consistent with those in the main model. As demonstrated in the main model, exclusive contracts make the platforms better off when consumers’ marginal valuation for content ( is low and worse off when is high. Consequently, when is low, exclusivity constitutes the Pareto-superior equilibrium for the platforms, whereas nonexclusivity is Pareto-superior when is high. Overall, the equilibrium structure mirrors that of the main model, and our central findings regarding the effects of exclusivity remain robust. For example, when is intermediate, exclusivity can yield a win–win equilibrium outcome for both platforms and content providers. In summary, moving to simultaneity does not alter the fundamental trade-offs analyzed in this study. The same two forces determine the platforms’ behaviors: a direct effect (exclusivity reduces same-side crowding) and a strategic effect (revenue sharing is a less effective lever for attracting providers under exclusivity). These forces pin down the best-response shares and, hence, which regime is jointly optimal, yielding the same ordering of regions as in the sequential benchmark.

## Part M: Multihoming Consumers

Our main model has assumed that each consumer can join only one platform. However, it is common for consumers in the content market to consume content on multiple platforms. We now examine the impact of consumer multi-homing on the platforms’ adoption of exclusive contracts. Specifically, we assume that consumers can derive additional benefits from the same content provider on a second platform, even if the provider is already on the first platform the consumer has joined. The utility functions of single-homing consumers are the same as those in our main model. A multihoming consumer’s utility can be given by

,(M1)

where represents the attenuation rate of consumers’ marginal benefit for content due to multihoming. The total number of content providers in the market is normalized to one. The term represents the number of multihoming providers. If , consumers do not gain any additional utility from encountering the same provider on a second platform. If , consumers derive the same benefit from engaging with a provider on both platforms. More content providers are expected to multi-home as increases because each provider tends to serve more consumers when they post content on multiple platforms. One can treat as a measure of consumers’ willingness to multi-home.

Following the analysis in the main model, we focus on the equilibrium outcomes with full participation on both sides of the platform. Thus, the base value provided by the platforms will not be too high in this extension. Other assumptions remain the same as those in the main model.

### Neither Platform Imposes Exclusivity ()

Under nonexclusive contracts, given the consumers’ utility functions in the main model and (M1), the numbers of consumers on each platform are given by

, (M2)

. (M3)

Simultaneously solving (3), (4) and (M2), (M3) gives the following market sizes as functions of the ad revenue-sharing rates

*,*

*,*

*,*

*.*

The platforms choose their ad revenue-sharing rates to maximize their profits in (5) and (6). The two platforms’ ad revenue-sharing rates, market sizes, and profits are as follows:

,

,

,

.

Plugging in, the equilibrium consumer surplus, providers’ total surplus, and social welfare can be given by

,

,

,

where .

Following the main analysis, a pure strategy equilibrium with positive revenue-sharing rates and full market coverage on both sides of the platform exists only when , , and . These constraints hold when the base value provided by the platforms satisfies , where and .

### Either or Both Platforms Impose Exclusivity ()

Under exclusive contracts, a multihoming consumer’s utility is , which is obtained by substituting into (M1). The numbers of consumers on each platform are given by

, (M4)

. (M5)

Simultaneously solving (7), (8) and (M4), (M5) gives the following market sizes as functions of the ad revenue-sharing rates

*,*

*,*

*,*

*.*

The platforms choose their ad revenue-sharing rates to maximize their profits in (5) and (6). The two platforms’ ad revenue-sharing rates, market sizes, and profits are as follows:

,

,

,

.

Plugging in, the equilibrium consumer surplus, providers’ total surplus, and social welfare can be given by

,

,

,

,

.

Following the main analysis, a pure strategy equilibrium with positive revenue-sharing rates and full market coverage on both sides of the platform exists only when , , and . These constraints hold when the base value provided by the platforms satisfies or , where and .

### Results and Insights

Next, we examine the economic impacts of exclusive contracts on market outcomes. Following the analysis in the main model, we focus on the more interesting case of full market coverage on both sides of the platform under exclusive and nonexclusive contracts. Proposition M1 presents the impacts of exclusive contracts on the platforms’ optimal ad revenue-sharing rates.

**Proposition M1.** *When consumers’ marginal valuation for content is low (high), platforms’ optimal ad revenue-sharing rates under exclusive contracts are lower (higher) than under nonexclusive contracts. Mathematically, there exists a threshold , which increases in , such that if , and if .*

**Proof of Proposition M1.** We examine how exclusive contracts impact ad revenue-sharing rates by comparing with , where and . Substituting this expression gives us , where and . In the feasible parameter region, we have . That is, increases in . One can also verify that can be positive or negative. Hence, there exists a threshold such that (i.e., )when and (i.e.,)when *.*

Next, we prove that increases in . Note that is the unique solution of . Given , using implicit differentiation, we get . In the feasible region, and . Thus, we get that . This completes the proof of Proposition M1. □

The following proposition summarizes how exclusive contracts influence the platforms’ equilibrium profits.

**Proposition M2.** *Exclusive contracts will increase (decrease) platforms’ profits if consumers’ marginal valuation for content is low (high). Mathematically, there exists a threshold , which increases in , such that if , and if .*

**Proof of Proposition M2.** We examine how exclusive contracts impact the platforms’ profits by comparing with , where and . Plugging in, we have when (and when ). In the feasible region, we can verify that . That is, decreases in . Further, there can happen or . Thus, there exists a threshold such that (i.e., ) if and (i.e., ) if .

Next, we prove that increases in . Note that is the unique solution of . Given , using implicit differentiation, we get , where and . In the feasible region, and one can verify that . Thus, we get that . This ends the proof of Proposition M2. □

**Corollary M1.** *Exclusive contracts emerge as the equilibrium only when .*

**Proof of Corollary M1.** Exclusive contracts arise as the equilibrium when . From the proof of Proposition M2, exclusive contracts emerge as the equilibrium only when. This completes the proof of Corollary M1. □

The following proposition captures the impact of platform exclusivity on the providers’ total surplus when exclusivity is the equilibrium.

**Proposition M3.** *When exclusivity is the equilibrium (i.e., ), exclusive contracts will decrease (increase) providers’ total surplus if consumers’ marginal valuation for content is low (high). Mathematically, there exists a threshold , which increases in , such that if , and if .*

**Proof of Proposition M3.** We examine how exclusive contracts impact providers’ total surplus by comparing with , where and . Plugging in, we have , where and . In the feasible region, one can verify that . We depict the analysis in two cases. First, when , we have . Thus, ; Second, when , if (and if ), where In the feasible region, we have . That is, decreases in . Following similar steps, we can verify that increasers or decreases in , or first increases and then decreases in . increasers or decreases in , or first increases and then decreases in . increasers or decreases in , or first decreases and then increases in . increasers or decreases in , or first decreases and then increases in . increasers or decreases in , or first decreases and then increases in . decreases in or first increases and then decreases in . first increases and then decreases in . One can also get that when is very low, can be negative when is very high, and there can happen in the feasible region. Hence, there exist thresholds and () such that (i.e., ) when and (i.e., ) when or . Following the analysis in the main model, one can also verify that . Thus, given , when and when . Following similar steps, one can verify that if and if . Thus, is the inverse function of . For any and , holds if and only if ( holds if and only if ). Following the proof of Proposition 3 in the main paper, we can verify that increases in . Because the detailed deriving process is very tedious, we omit the proof steps here. This ends the proof of Proposition M3. □

**Proposition M4.** *Exclusive contracts can achieve a win-win outcome for platforms and content providers when consumers’ marginal valuation for content is moderate. Mathematically,*  *and* *when* *.*

**Proof of proposition M4.** By combining the results of Proposition M2 and M3, one can derive the results. This ends the proof of Proposition M4. □

Proposition M5 below summarizes the impacts of exclusive contracts on consumer surplus and social welfare when content exclusivity is the equilibrium.

**Proposition M5.** *When content exclusivity arises as the equilibrium (i.e., when ), we get:*

1. *Exclusive contracts reduce the consumer surplus, i.e., ;*
2. *Exclusive contracts reduce (increase) the social welfare when consumers’ marginal valuation for content is low (high). Mathematically, there exists a threshold such that if , and*  *if* .

**Proof of proposition M5.** (a) We first compare with , where and . Plugging in, we have , where and . In the feasible parameter region, we have . Thus, we can depict the analysis into two cases. First, if , . Second, if , when (and when ). We have . That is, decreases in . In the feasible region, one can show that can be negative or positive when is very low and when is very high. Thus, first increases and then decreases in or decreases in . Following similar steps, we can verify that first decreases and then increases in or increases in . first decreases and then increases in or increases in . One can verify that when is very high or very low. Hence, always holds. By summarizing the above results, we get that .

(b) Next, we compare with . Plugging in, we have , where and . We depict the following analysis in four cases. First, if and . when (and when ), where and . In the feasible region, one can verify that . Thus, when and when . Further, we can verify that . That is, increases in . Since there can happen when is low and when is high. Hence, there exists a threshold such that (i.e., ) if and (i.e., ) if .; Second, if and , we obtain that ; Third, if and , ; Fourth, if and , when (and when ). Since and increases in , one can verify that always holds in the feasible region. Thus, when and . By summarizing the above results, given , we get that if and if . This ends the proof of Proposition M5. □

To summarize, our key findings on the impacts of exclusive contracts are consistent with those in the main model. Specifically, the platforms’ optimal ad revenue-sharing rates under exclusive contracts are lower (higher) than under nonexclusive contracts when consumers’ marginal valuation for content is low (high); Exclusive contracts make the platforms better off when consumers’ marginal valuation for content () is low and worse off when is high; Content exclusivity can lead to a win-win outcome for platforms and content providers when is intermediate.

## Part N: Higher Marginal Ad Revenue of Single-homing Providers

In the main model, we assume that the marginal ad revenue from a consumer for exclusive and nonexclusive providers is homogeneous. In practice, platforms may allow content providers to explicitly label their content as exclusive to the platforms. This feature can enhance consumer engagement for content providers who choose to single-home. Consequently, the marginal ad revenue for single-homing providers could be higher than that for multihoming providers. Let represent the single-homing content providers’ marginal ad revenue from a consumer and represent the multihoming providers’ marginal ad revenue from a consumer, where measures the multihoming-induced reduction in the marginal ad revenue from a consumer. Other assumptions remain the same as those in the main model. In the absence of exclusive contracts, each content provider can choose one of the following three options:

(i) Only join platform : .

(ii) Only join platform : .

(iii) Join both platforms and : .

### Neither Platform Imposes Exclusivity ()

Under nonexclusive contracts, the numbers of providers on each platform are given by

, (N1)

. (N2)

Simultaneously solving (1), (2) and (N1), (N2) gives the following market sizes as functions of the ad revenue-sharing rates

*,*

*,*

*,*

*.*

The platforms choose their ad revenue-sharing rates to maximize their profits:

,

.

We define . The two platforms’ ad revenue-sharing rates, market sizes, and profits are as follows:

,

,

,

.

Plugging in the above equilibrium outcomes, consumer surplus, providers’ total surplus, and social welfare can be given by

,

,

.

Following the main analysis, a pure-strategy equilibrium with positive revenue-sharing rates and full provider participation exists only when and . These constraints equal to , where .

### Either or Both Platforms Impose Exclusivity ()

Under exclusive contracts, all content providers single-home. The equilibrium results are the same as those under exclusive contracts in the main model.

### Results and Insights

Next, we examine the economic impacts of exclusive contracts on market outcomes. Following the analysis in the main model, we focus on the pure-strategy equilibrium characterized by positive revenue-sharing rates, full provider participation, and partial multihoming. Throughout this section, consumers’ marginal valuation for content () satisfies . Proposition N1 presents the impacts of exclusive contracts on the platforms’ optimal ad revenue-sharing rates.

**Proposition N1.** *When consumers’ marginal valuation for content is low (high), platforms’ optimal ad revenue-sharing rates under exclusive contracts are lower (higher) than under nonexclusive contracts. Mathematically, there exists , which increases in , such that if , and if .*

**Proof of Proposition N1.** We examine how exclusive contracts impact ad revenue-sharing rates by comparing with , where and . Plugging in, we have , where and . Conditional on , we have . That is, increases in . We can also verify that can be positive or negative. Hence, there exists a threshold such that (i.e., )when and(i.e., )when.

Next, we prove that increases in . Note that when (and when ). In the feasible region, . Thus, when (and when ). We have proved that when andwhen *.* Thus, is the inverse function of . Following the proof of Proposition 3 in the main paper, we can get that increases in . This ends the proof of Proposition N1. □

The following proposition summarizes how exclusive contracts influence the platforms’ equilibrium profits.

**Proposition N2.** *Exclusive contracts will increase (decrease) platforms’ profits if consumers’ marginal valuation for content is low (high). Mathematically, there exists a threshold , which increases in , such that if , and if .*

**Proof of Proposition N2.** We examine how exclusive contracts impact the platforms’ profits by comparing with , where and . Plugging in, we have , where and . Conditional on , one can verify that . That is, increases in . Similarly, we can get that when is low and when is high. Thus, first decreases and then increases. Further, can be positive or negative when is low and when is high. Hence, there exists a threshold such that (i.e., ) if and (i.e., ) if . Following similar steps, one can verify that if and if . Because the detailed deriving process is very tedious, we omit the proof steps here. Thus, is the inverse function of . Following the proof of Proposition 3 in the main paper, we can verify that increases in . This ends the proof of Proposition N2. □

**Corollary N1.** *Exclusive contracts emerge as the equilibrium only when .*

**Proof of Corollary N1.** Exclusive contracts arise as the equilibrium when . From the proof of Proposition N2, exclusive contracts emerge as the equilibrium only when. This completes the proof of Corollary N1. □

The following proposition captures the impact of platform exclusivity on the providers’ total surplus when content exclusivity is the equilibrium.

**Proposition N3.** *When exclusivity is the equilibrium (i.e., ), exclusive contracts will decrease (increase) providers’ total surplus if consumers’ marginal valuation for content is low (high). Mathematically, there exists a threshold , which increases in , such that if , and if .*

**Proof of Proposition N3.** We examine how exclusive contracts impact providers’ total surplus by comparing with , where and . Plugging in, we have , where and =. We depict the analysis in two cases. First, when , we have ; Second, when , if (and when ), where . Conditional on , one can verify that . That is, increases in . Following similar steps in the main paper, we can get that first decreases and then increase in . One can also get that is positive when is very low or very high, and there can happen . Hence, there exist thresholds and () such that (i.e., ) when and (i.e., ) when or . One can verify that . That is, . Thus, given , when and when . Following similar steps, one can verify that if and if . Because the detailed deriving process is very tedious, we omit the proof steps here. Thus, is the inverse function of . Following the proof of Proposition 3 in the main paper, we can verify that increases in . This ends the proof of Proposition N3. □

**Proposition N4.** *Exclusive contracts can achieve a win-win outcome for platforms and content providers when consumers’ marginal valuation for content is moderate. Mathematically,*  *and* *when* *.*

**Proof of proposition N4.** By combining the results of Propositions N2 and N3, one can derive the results. This ends the proof of Proposition N4. □

Next, we examine the impacts of exclusive contracts on consumer surplus and social welfare when content exclusivity is the equilibrium. The proposition below summarizes the results.

**Proposition N5.** *When content exclusivity arises as the equilibrium (i.e., when ), we get:*

1. *Exclusive contracts reduce the consumer surplus, i.e., ;*
2. *Exclusive contracts reduce (increase) the social welfare when consumers’ marginal valuation for content is low (high). Mathematically, there exists a threshold such that if , and*  *if* .

**Proof of proposition N5.** (a) We first compare with , where and . Plugging in, we have . Note that decreases in . Conditional on , we have . Thus, we get that .

(b) Next, we compare with . Plugging in, we have , where , , and . We depict the analysis into four cases. First, if and , when , where and . We have . That is, increases in . Following similar steps, we have and increases in . Further, we have and increases in . Conditional on , one can verify that and there can happen . Hence, there exists a thresholdsuch that(i.e.,) if, and(i.e.,) if . Second, if and , . Third, if and , . Fourth, if and , when (and when ). Following the analysis in the case of and , we can get . Thus, when and . By summarizing the above results, given , we get that there exists a thresholdsuch that if, and if . This ends the proof of Proposition N5. □

To summarize, our key findings on the impacts of exclusive contracts are consistent with those in the main model. Specifically, the platforms set lower (higher) ad revenue-sharing rates under exclusive contracts than under nonexclusive contracts when consumers’ marginal valuation for content is low (high); Exclusive contracts emerge as the equilibrium only when consumers’ marginal valuation for content is relatively low; Content exclusivity can lead to a win-win outcome for platforms and content providers when consumers’ marginal valuation for content is moderate.

1. Note that this condition also ensures the provider market is fully covered. [↑](#footnote-ref-1)
2. Our feasible region (i.e., and ) equals to , where (). We use this constraint on in the following proof. [↑](#footnote-ref-2)
3. solves . [↑](#footnote-ref-3)
4. is the upper bond of the focused region andsolves. [↑](#footnote-ref-4)
5. The feasible region equals to , where () and solves . We use this constraint on in the following proof. [↑](#footnote-ref-5)
6. Refer to <https://support.google.com/youtube/answer/72851?sjid=8707318126629527895-NC>. [↑](#footnote-ref-6)
7. is the upper bond of the focused region andsolves. [↑](#footnote-ref-8)
8. Our focused region put constraint on , given by (). We use this constraint on in the following proof. [↑](#footnote-ref-9)
9. is the upper bond of the focused region andsolves. [↑](#footnote-ref-10)
10. Our focused region put constraint on , given by , where (). We use this constraint on in the following proof. [↑](#footnote-ref-11)
11. is the upper bond of the focused region andsolves. [↑](#footnote-ref-12)
